# Supplementary material for: Evaluation of alternative procedures for the provision of consensus and assigned values to sixteen trace elements in natural water used for an ICP-MS proficiency testing exercise
Source: Royal Society of Chemistry journal article supplement (doi:10.1039/b905037j), 2009-01-01

## **SUPPLEMENTARY INFORMATION FOR**

### **EVALUATION OF ALTERNATIVE PROCEDURES FOR THE PROVISION OF CONSENSUS AND ASSIGNED VALUES TO SIXTEEN TRACE ELEMENTS IN NATURAL WATER USED FOR AN ICP-MS PROFICIENCY TESTING EXERCISE**

**José Ángel Rodríguez-Castrillón, Mariella Moldovan and José Ignacio García Alonso\***

*Department of Physical and Analytical Chemistry, University of Oviedo  
Julián Clavería 8, 33006-Oviedo, Spain*

\*Author to whom correspondence should be addressed

phone: +34 985103484

fax: +34 985103125

e-mail: [jiga@uniovi.es](mailto:jiga@uniovi.es)

## **ALPHABETICAL LIST OF PARTICIPATING LABORATORIES**

Adirondack (Laboratorio de Análisis y Ensayos)  
Agriquem (Laboratorio Agroalimentario y Medioambiental)  
ATISAE  
CENIM (Centro Nacional de Investigaciones Metalúrgicas)  
Centro de Astrobiología CSIC-INTA  
Centro Fraisoro  
CiMA  
Confederación Hidrográfica del Duero  
EMASA (Empresa Municipal Aguas de Málaga)  
EMATSA (Empresa Municipal de Aguas de Tarragona)  
GEOCISA  
IGME (Instituto Geológico y Minero de España)  
INCAR (Instituto Nacional del Carbón)  
Ingenieros Asesores  
Instituto de Medicina Preventiva del Ejército de Tierra  
IPROMA (Investigación y Proyectos Medio Ambiente S.L.)  
LABAQUA  
Laboratorio Agrario de Madrid  
Laboratorio Dr. Echevarne  
Laboratorio de Salud Pública de Alicante  
Laboratorio de Salud Pública de la Generalitat de Valencia  
Laboratorio de Sanidad de Murcia  
Laboratorio de Sanidad de Vizcaya - Gobierno Vasco  
Universidad Autónoma de Madrid - SIDI - Laboratorio de ICP-MS  
Universidad de A Coruña - Servicio de Apoyo a la Investigación  
Universidad de Alicante - Servicios Técnicos de Investigación  
Universidad de Almería - Servicio ICP-MS  
Universidad de Burgos - Servicio Central de Apoyo a la Investigación  
Universidad de Cantabria - Departamento de Ingeniería Química y Química Orgánica  
Universidad de Córdoba - Laboratorio de Espectrometría de Masas  
Universidad de Jaén - Servicios Técnicos de Investigación  
Universidad de Girona - Serveis Tècnics de Recerca  
Universidad de León - Laboratorio de Técnicas Instrumentales  
Universidad de Oviedo - Departamento de Química Física y Analítica  
Universidad de Oviedo - Servicios Científico-Técnicos  
Universidad de Sevilla - CITIUS - Servicio de Investigación Agraria  
Universidad de Sevilla - CITIUS - Servicio de Radioisótopos  
Universidad de Valladolid - Laboratorio de Técnicas Instrumentales  
Universidad de Vigo - Centro de Apoyo Científico y Tecnológico a la Investigación  
Universidad de Zaragoza - I3A - GUIA  
Universidad de Zaragoza - Laboratorio Central de Análisis  
Universidad del País Vasco - IBERCRON  
Universidad del País Vasco - Departamento de Química Analítica (Bilbao)  
Universidad del País Vasco - Departamento de Química Analítica (Vitoria)  
Universidad Jaime I - Departamento de Ciencias Experimentales  
Universidad Politécnica de Cartagena - Servicio de Apoyo a la Investigación Tecnológica  
Universidad Politécnica de Cataluña - CTM Centro Tecnológico

**Table SI-1:** Summary of ICP-MS instruments employed by the participating laboratories.

| Type of ICP-MS instrument | Number of labs |
|---------------------------|----------------|
| Leco Renaissance          | 1              |
| Thermo Element2           | 1              |
| Thermo X7                 | 3              |
| Thermo X Series           | 2              |
| Thermo PQ-Excell          | 1              |
| Varian                    | 2              |
| Perkin Elmer Elan 6000    | 4              |
| Perkin Elmer Elan 6100    | 2              |
| Perkin Elmer Elan 9000    | 3              |
| Perkin Elmer Elan DRC     | 2              |
| Hewlett Packard 4500      | 2              |
| Agilent 7500              | 5              |
| Agilent 7500a             | 4              |
| Agilent 7500c             | 6              |
| Agilent 7500ce            | 5              |
| not reported              | 4              |

**Table SI-2:** Summary of the preparation material and procedure employed by the participating laboratories.

| <b>Lab</b> | <b>Preparation Material</b> | <b>Preparation Procedure</b> |
|------------|-----------------------------|------------------------------|
| 1          | other                       | volume                       |
| 2          |                             |                              |
| 3          | plastic                     | weight                       |
| 4          | plastic                     | volume                       |
| 6          | plastic                     | weight                       |
| 7          | plastic                     | weight                       |
| 8          | plastic                     | weight                       |
| 9          |                             |                              |
| 10         | plastic                     | weight                       |
| 11         | glass                       | volume                       |
| 13         | glass                       | volume                       |
| 14         | glass                       | volume                       |
| 15         | plastic                     | volume                       |
| 16         | plastic                     | weight                       |
| 17         | plastic                     | weight                       |
| 18         | plastic                     | volume                       |
| 19         | plastic                     | weight                       |
| 21         |                             |                              |
| 22         |                             |                              |
| 23         | glass                       | volume                       |
| 24         |                             |                              |
| 25         |                             |                              |
| 27         | plastic                     | volume                       |
| 28         | plastic                     | volume                       |
| 30         | plastic                     | volume                       |
| 32         | plastic                     | volume                       |
| 33         | plastic                     | volume                       |
| 34         | plastic                     | volume                       |
| 35         | glass                       | volume                       |
| 37         | plastic                     | volume                       |
| 38         | plastic                     | weight                       |
| 39         | glass                       | weight                       |
| 40         | plastic                     | volume                       |
| 41         | plastic                     | weight                       |
| 42         | glass                       | volume                       |
| 44         | plastic                     | volume                       |
| 45         | plastic                     | weight                       |
| 48         | plastic                     | weight                       |
| 49         | plastic                     | volume                       |
| 50         | plastic                     | volume                       |
| 51         | plastic                     | weight                       |
| 52         | plastic                     | weight                       |
| 54         | plastic                     | volume                       |
| 55         | plastic                     | volume                       |
| 56         | plastic                     | weight                       |
| 57         | plastic                     | weight                       |
| uniovi     | plastic                     | weight                       |

Table SI-3: Aluminium.

| Lab    | Working Isotopes | Internal Standard                 | Calibration Range | Dilution Factor  | Quality Control | Interference Correction | Cell Gas          |
|--------|------------------|-----------------------------------|-------------------|------------------|-----------------|-------------------------|-------------------|
| 1      | 27               | Rh-Tb                             | 0 - 50            | ½                | yes             | no                      | no                |
| 2      |                  |                                   |                   |                  |                 |                         |                   |
| 3      | 27               | <sup>71</sup> Ga                  | 0 - 100           |                  | yes             | no                      | no                |
| 4      | 27               | <sup>115</sup> In                 | 0 - 25            |                  | yes             | no                      | no                |
| 6      | 27               | no                                | 0 - 200           | no               | yes             | no                      | no                |
| 7      | 27               | <sup>103</sup> Rh                 | 0 - 200           |                  | no              | no                      | no                |
| 8      | 27               | Rh                                | 25 - 200          | 1                | yes             | no                      | no                |
| 9      | 27               | no                                |                   |                  |                 | no                      |                   |
| 10     | 27               | <sup>7</sup> Li                   | 0 - 260           | 1                | yes             | no                      | no                |
| 11     | 27               | <sup>45</sup> Sc                  | 1 - 50            | 1                | yes             | no                      | no                |
| 13     | 27               | 45                                |                   | 1                | yes             | no                      | no                |
| 14     | 27               | Sc                                | 0 - 200           | 1                | yes             | no                      | no                |
| 15     | 27               | <sup>89</sup> Y                   | 0.2 - 25          |                  | no              | no                      | H <sub>2</sub>    |
| 16     | 27               | <sup>45</sup> Sc                  | 0 - 100           |                  | yes             | no                      | no                |
| 17     | 27               | Y                                 | 0 - 40            | 1                | no              | no                      | no                |
| 18     | 27               | Sc                                | 20 - 500          |                  | yes             | no                      | no                |
| 19     | 27               | In                                | 0 - 500           |                  | no              | no                      |                   |
| 21     |                  |                                   |                   |                  |                 |                         |                   |
| 22     |                  |                                   |                   |                  |                 |                         |                   |
| 23     | 27               | <sup>45</sup> Sc                  | 0 - 80            | 1                | no              | no                      | no                |
| 24     | 27               | <sup>89</sup> Y                   |                   |                  |                 |                         |                   |
| 25     | 27               | <sup>45</sup> Sc                  | 0.5 - 1000        | 1                |                 | no                      | no                |
| 27     | 27               |                                   | 1 - 50            | no               | yes             | no                      | no                |
| 28     | 27               | In                                | 0.1 - 50          | no               | no              | no                      | no                |
| 30     | 27               | Rh                                | 1 - 100           | without dilution | yes             | no                      | no                |
| 32     | 27               | In                                | 0 - 100           | 1.075            | yes             | no                      | no                |
| 33     | 27               | Er                                |                   | 1                | yes             | no                      | no                |
| 34     | 27               | <sup>6</sup> Li- <sup>45</sup> Sc | 0.1 - 10          | 10               | yes             | no                      | no                |
| 35     | 27               | Rh                                | 5 - 100           |                  | yes             | no                      | no                |
| 37     | 27               | <sup>72</sup> Ge                  | 1 - 100           |                  | yes             | no                      | low res           |
| 38     | 27               | In                                | 2.5 - 50          |                  | yes             | no                      | no                |
| 39     | 27               | Sc, In, Bi                        | 8 - 5000          | 1.25, 1.67, 2.51 | yes             | no                      | no                |
| 40     | 27               | Rh                                | 1 - 20            | 2                | no              |                         | no                |
| 41     | 27               | Tl                                | 10 - 100          | 50%              | no              |                         | He/H <sub>2</sub> |
| 42     | 27               | <sup>103</sup> Rh                 | 5 - 100           | 1.04             | yes             | no                      | no                |
| 44     | 27               | Li                                | 0 - 52            | 3.3              | yes             |                         | H <sub>2</sub>    |
| 45     | 27               | Rh                                | 1.6 - 2000        |                  | yes             | no                      | no                |
| 48     | 27               | Sc                                | 0 - 98            | ~1               | yes             | no                      | no                |
| 49     | 27               | Sc                                | 10 - 100          |                  | yes             |                         | no                |
| 50     | 27               | Sc                                | 0.5 - 100         | without dilution | yes             | no                      | no                |
| 51     | 27               |                                   | 1 - 40            |                  | no              | no                      | no                |
| 52     | 27               | Ga                                | 1 - 100           |                  | yes             | no                      | no                |
| 54     | 27               | Sc, Rh, Pd, Pt, Y                 | 10 - 100          |                  | yes             | no                      | no                |
| 55     | 27               | <sup>115</sup> In                 | 0.5 - 250         | 1                | yes             | no                      | no                |
| 56     | 27               | 89                                | 1 - 50            | 1.01             | no              | no                      | no                |
| 57     | 27               | <sup>71</sup> Ga                  | 0 - 20            | 1 to 5           | no              | no                      | no                |
| uniovi | 27               | <sup>71</sup> Ga                  | 0 - 50            |                  | yes             | no                      | no                |

Table SI-4: Antimony.

| Lab    | Working Isotopes | Internal Standard                    | Calibration Range | Dilution Factor    | Quality Control | Interference Correction | Cell Gas           |
|--------|------------------|--------------------------------------|-------------------|--------------------|-----------------|-------------------------|--------------------|
| 1      | 121              | Rh, Tb                               | 0 - 10            | 1/2                | yes             | no                      | no                 |
| 2      |                  |                                      |                   |                    |                 |                         |                    |
| 3      | 121              | <sup>103</sup> Rh                    | 0 - 10            |                    | yes             | no                      | no                 |
| 4      | 121              | <sup>115</sup> In                    | 0 - 25            |                    | yes             | no                      | no                 |
| 6      | 121              | no                                   | 0 - 25            | no                 | yes             | no                      | no                 |
| 7      | 121              | <sup>103</sup> Rh                    | 0 - 150           |                    | no              | no                      | no                 |
| 8      | 121              | Rh                                   | 1 - 25            | 1                  | yes             | no                      | no                 |
| 9      | 123              | no                                   |                   |                    |                 | no                      |                    |
| 10     | 121              |                                      | 0 - 5             | 1                  | yes             | no                      | no                 |
| 11     | 121              | <sup>115</sup> In                    | 1 - 50            | 1                  | yes             | no                      | no                 |
| 13     | 121              | 159                                  |                   | 1                  | yes             | no                      | no                 |
| 14     | 121              | Rh                                   | 0 - 10            | 1                  | yes             | no                      | no                 |
| 15     | 121              | <sup>103</sup> Rh                    | 0.2 - 25          |                    | no              | no                      | H <sub>2</sub>     |
| 16     | 121 (123)        | <sup>159</sup> Tb                    | 0 - 10            |                    | yes             | no                      | no                 |
| 17     | 121              | no                                   | 0 - 40            | 1                  | no              | no                      | no                 |
| 18     | 121              | Rh                                   | 0.3 - 20          |                    | yes             | no                      | no                 |
| 19     | 121              | In                                   | 0 - 50            |                    | no              | no                      |                    |
| 21     | 121              |                                      | 1 - 100           |                    | no              | no                      | no                 |
| 22     | 121, 123         | In                                   |                   |                    | yes             | no                      | no                 |
| 23     | 121              | <sup>89</sup> Y                      | 0 - 4             | 1                  | no              | no                      | He                 |
| 24     | 121              | <sup>159</sup> Tb                    |                   |                    |                 |                         |                    |
| 25     | 121              | <sup>115</sup> In                    | 0.5 - 100         | 1                  |                 | no                      | no                 |
| 27     | 121              |                                      | 1 - 10            | no                 | yes             | no                      | no                 |
| 28     | 121, 123         | In                                   | 0.1 - 5           | no                 | no              | no                      | no                 |
| 30     |                  |                                      |                   |                    |                 |                         |                    |
| 32     | 121              | In                                   | 0 - 25            | 1.075              | yes             | no                      | no                 |
| 33     | 121              | Er                                   |                   | 1                  | yes             | no                      | no                 |
| 34     | 121              | <sup>115</sup> In- <sup>159</sup> Tb | 0.1 - 5           | 10                 | yes             | no                      | no                 |
| 35     | 121              | Rh                                   | 0.5 - 5           | 8/25, 12/25, 20/25 | yes             | no                      | no                 |
| 37     | 121              | <sup>115</sup> In                    | 0.25 - 25         |                    | yes             | no                      | low res            |
| 38     | 121              | In                                   | 0.1 - 10          |                    | yes             | no                      | no                 |
| 39     | 123              | Sc, In, Bi                           | 2 - 1200          | 1.25, 1.67, 2.51   | yes             | no                      | H <sub>2</sub> /He |
| 40     | 121              | <sup>103</sup> Rh                    | 0.5 - 5           | 2                  | no              |                         | no                 |
| 41     | 121              | no                                   |                   | 50%                | no              | no                      | no                 |
| 42     | 121              | <sup>103</sup> Rh                    | 0.1 - 5           | 1.04               | yes             | no                      | no                 |
| 44     | 121, 123         | Rh, Bi                               | 0 - 5             | 3.3                | yes             | no                      | He                 |
| 45     |                  |                                      |                   |                    |                 |                         |                    |
| 48     | 123              | Sc                                   | 0 - 25            | ~1                 | yes             | yes                     | no                 |
| 49     |                  | Sc                                   | 10 - 100          |                    | yes             | yes                     | no                 |
| 50     | 121, 123         | Rh                                   | 0.5 - 100         | without dilution   | yes             | yes                     | no                 |
| 51     |                  |                                      |                   |                    |                 |                         |                    |
| 52     | 121, 123         | In                                   | 1 - 100           |                    | yes             | no                      | no                 |
| 54     | 121              | Sc, Rh, Pd, Pt, Y                    | 1 - 50            |                    | yes             | no                      | no                 |
| 55     | 121              | <sup>159</sup> Tb                    | 0.5 - 250         | 1                  | yes             | no                      | no                 |
| 56     | 121, 123         | 103                                  | 1 - 5             | 1.01               | no              | no                      | no                 |
| 57     | 121              | <sup>115</sup> In                    | 0 - 0.5           | 1 to 5             | no              | no                      | no                 |
| uniovi | 121              | <sup>123</sup> Sb                    | IDA               |                    | yes             | no                      | no                 |

Table SI-5: Arsenic.

| Lab    | Working Isotopes | Internal Standard                 | Calibration Range | Dilution Factor    | Quality Control | Interference Correction | Cell Gas           |
|--------|------------------|-----------------------------------|-------------------|--------------------|-----------------|-------------------------|--------------------|
| 1      | 75               | Rh-Tb                             | 0 - 10            | 1/2                | yes             | yes                     | no                 |
| 2      |                  |                                   |                   |                    |                 |                         |                    |
| 3      | 75               | <sup>71</sup> Ga                  | 0 - 20            |                    | yes             | yes                     | no                 |
| 4      | 75               | <sup>115</sup> In                 | 0 - 25            |                    | yes             | no                      | no                 |
| 6      | 75               | no                                | 0 - 25            | no                 | yes             | no                      | no                 |
| 7      | 75               | <sup>103</sup> Rh                 | 0 - 150           |                    | no              | no                      | no                 |
| 8      | 75               | Rh                                | 1 - 25            | 1                  | yes             | yes                     | no                 |
| 9      | 75               | no                                |                   |                    |                 | no                      |                    |
| 10     | 75               | <sup>71</sup> Ga                  | 0 - 50            | 1                  | yes             | no                      | no                 |
| 11     | 75               | <sup>72</sup> Ge                  | 1 - 50            | 1                  | yes             | yes                     | no                 |
| 13     | 75               | 72                                |                   | 1                  | yes             | yes                     | no                 |
| 14     | 75               | Ga                                | 0 - 20            | 1                  | yes             | yes                     | no                 |
| 15     | 75               | <sup>89</sup> Y                   | 0.2 - 25          |                    | no              | no                      | H <sub>2</sub>     |
| 16     | 75               | <sup>89</sup> Y                   | 0 - 10            |                    | yes             | no                      | no                 |
| 17     | 75               | no                                | 0 - 40            | 1                  | no              | no                      | no                 |
| 18     | 75               | Y                                 | 0.3 - 20          |                    | yes             | yes                     | no                 |
| 19     | 75               | In                                | 0 - 50            |                    | no              | no                      |                    |
| 21     | 75               |                                   | 0.1 - 100         |                    | no              | no                      | no                 |
| 22     | 75               | Rh                                |                   |                    | yes             | no                      | no                 |
| 23     | 75               | <sup>89</sup> Y                   | 0.25 - 2          | 1                  | no              | no                      | He                 |
| 24     | 75               | <sup>89</sup> Y                   |                   |                    |                 | yes                     |                    |
| 25     | 75               | <sup>115</sup> In                 | 0.5 - 50          | 1                  |                 | yes                     | no                 |
| 27     | 75               |                                   | 0.5 - 10          | no                 | yes             | no                      | no                 |
| 28     | 75               | In                                | 0.1 - 5           | no                 | no              | no                      | no                 |
| 30     | 75               | Rh                                | 1 - 25            | without dilution   | yes             | no                      |                    |
| 32     | 75               | In                                | 0 - 25            | 1.075              | yes             | no                      | no                 |
| 33     | 75               | Er                                |                   | 1                  | yes             | no                      | no                 |
| 34     | 75               | <sup>45</sup> Sc- <sup>89</sup> Y | 0.1 - 5           | 10                 | yes             | yes                     | no                 |
| 35     | 75               | Rh                                | 0.5 - 10          | 8/25, 12/25, 20/25 | yes             | no                      | no                 |
| 37     | 75               | <sup>72</sup> Ge                  | 0.25 - 25         |                    | yes             | no                      | high res           |
| 38     | 75               | In                                | 0.1 - 10          |                    | yes             | no                      | no                 |
| 39     | 75               | Sc, In, Bi                        | 2 - 1200          | 1.25, 1.67, 2.51   | yes             | no                      | H <sub>2</sub> /He |
| 40     |                  |                                   |                   |                    |                 |                         |                    |
| 41     | 75               | Tl                                | 1 - 10            | 50%                | no              | no                      | He/H <sub>2</sub>  |
| 42     | 75               | <sup>103</sup> Rh                 | 0.5 - 30          | 1.04               | yes             | yes                     | no                 |
| 44     | 75               | Li, Rh                            | 0 - 5             | 3.3                |                 | no                      | He                 |
| 45     | 75               | Rh                                | 0.08 - 100        |                    | yes             | yes                     |                    |
| 48     | 75               | Sc                                | 0 - 24            | ~1                 | yes             | yes                     | no                 |
| 49     | 75               | Ge                                | 10 - 100          |                    | yes             | yes                     | no                 |
| 50     | 75               | Ge                                | 0.5 - 50          | without dilution   | yes             | yes                     | no                 |
| 51     | 75               |                                   | 1 - 20            |                    | no              | no                      | no                 |
| 52     | 75               | Ga                                | 1 - 100           |                    | yes             | no                      | no                 |
| 54     | 75               | Sc, Rh, Pd, Pt, Y                 | 1 - 50            |                    | yes             | yes                     | no                 |
| 55     | 75               | Sc, In, Tb, Bi                    | 0.5 - 250         | 1                  | yes             | yes                     | no                 |
| 56     | 75               | 89                                | 1 - 5             | 1.01               | no              | no                      | no                 |
| 57     | 75               | <sup>103</sup> Rh                 | 0 - 0.5           | 1 to 5             | no              | no                      | no                 |
| uniovi | 75               | <sup>71</sup> Ga                  | 0 - 5             |                    | yes             | no                      | H <sub>2</sub>     |

Table SI-6: Boron.

| Lab    | Working Isotopes | Internal Standard                 | Calibration Range | Dilution Factor    | Quality Control | Interference Correction | Cell Gas          |
|--------|------------------|-----------------------------------|-------------------|--------------------|-----------------|-------------------------|-------------------|
| 1      | 11               | Rh-Tb                             | 0 - 50            | 1/2                | yes             | no                      | no                |
| 2      |                  |                                   |                   |                    |                 |                         |                   |
| 3      | 11               | <sup>71</sup> Ga                  | 0 - 200           |                    | yes             | no                      | no                |
| 4      |                  |                                   |                   |                    |                 |                         |                   |
| 6      |                  |                                   |                   |                    |                 |                         |                   |
| 7      | 11               | <sup>103</sup> Rh                 | 0 - 500           |                    | no              | no                      | no                |
| 8      | 11               | Rh                                | 25 - 200          | 1                  | yes             | no                      | no                |
| 9      | 11               | no                                |                   |                    |                 | no                      |                   |
| 10     | 11               | no                                | 0 - 500           | 1                  | yes             | no                      | no                |
| 11     | 11               | <sup>45</sup> Sc                  | 10 - 100          | 1                  | yes             | no                      | no                |
| 13     |                  |                                   |                   |                    |                 |                         |                   |
| 14     | 11               | Sc                                | 0 - 200           | 1                  | yes             | no                      | no                |
| 15     | 11               | <sup>89</sup> Y                   | 0.2 - 25          |                    | no              | no                      | H <sub>2</sub>    |
| 16     | 11 (10)          | <sup>45</sup> Sc                  | 0 - 200           |                    | yes             | no                      | no                |
| 17     | 11               | Y                                 | 0 - 40            | 1                  | no              | no                      | no                |
| 18     | 11               | Sc                                | 0.6 - 400         |                    | yes             | no                      | no                |
| 19     | 11               | In                                | 0 - 2000          |                    | no              | yes                     | no                |
| 21     | 11               |                                   | 1 - 100           |                    |                 |                         | no                |
| 22     |                  |                                   |                   |                    |                 |                         |                   |
| 23     | 11               | <sup>45</sup> Sc                  | 0 - 80            | 1                  | no              | no                      | no                |
| 24     | 11               | <sup>89</sup> Y                   |                   |                    |                 |                         |                   |
| 25     |                  |                                   |                   |                    |                 |                         |                   |
| 27     | 11               |                                   | 1 - 200           | no                 | yes             | no                      | no                |
| 28     | 11               | In                                | 50 - 500          |                    | no              | no                      |                   |
| 30     | 11               | Rh                                | 1 - 200           | without dilution   | yes             | no                      | no                |
| 32     |                  | In                                | 0 - 25            | 1.075              | yes             | no                      | no                |
| 33     |                  |                                   |                   |                    |                 |                         |                   |
| 34     | 11               | <sup>6</sup> Li- <sup>45</sup> Sc | 0.1 - 50          | 10                 | yes             | no                      | no                |
| 35     | 11               | Rh                                | 0.1 - 1000        | 8/25, 12/25, 20/25 | yes             | no                      | no                |
| 37     | 11               | <sup>45</sup> Sc                  | 5 - 500           |                    | yes             | no                      | med res           |
| 38     | 10               | In                                | 5 - 500           |                    | yes             | no                      | no                |
| 39     | 11               | Sc, In, Bi                        | 28 - 16000        | 1.25, 1.67, 2.51   | yes             |                         | no                |
| 40     | 11               | Rh                                | 10 - 100          | 2                  |                 |                         | no                |
| 41     | 11               | <sup>205</sup> Tl                 | 50 - 500          | 50%                | no              | no                      | He/H <sub>2</sub> |
| 42     | 10               | <sup>103</sup> Rh                 | 0.1 - 2000        | 1.04               | yes             | no                      | no                |
| 44     |                  |                                   |                   |                    |                 |                         |                   |
| 45     |                  |                                   |                   |                    |                 |                         |                   |
| 48     | 11               | Be                                | 0 - 486           | ~1                 | yes             | no                      | no                |
| 49     | 11               | Sc                                | 200 - 2000        |                    | yes             |                         | no                |
| 50     | 11               | Sc                                | 0.5 - 500         | without dilution   | yes             | no                      | no                |
| 51     |                  |                                   |                   |                    |                 |                         |                   |
| 52     | 10, 11           | Ga                                | 1 - 100           |                    | yes             | no                      | no                |
| 54     | 11               | Sc, Rh, Pd, Pt, Y                 | 1 - 200           |                    | yes             | no                      | no                |
| 55     | 11               | Sc, In, Tb, Bi                    | 0.5 - 250         | 1                  | yes             | no                      | no                |
| 56     | 10, 11           | 89                                | 1 - 100           | 1.01               | no              | no                      | no                |
| 57     | 11               | <sup>71</sup> Ga                  | 0 - 5             | 1 to 5             |                 | no                      | no                |
| uniovi | 11               | <sup>10</sup> B                   | IDA               |                    | yes             | no                      | no                |



Table SI-7: Cadmium.

| Lab    | Working Isotopes | Internal Standard                  | Calibration Range | Dilution Factor    | Quality Control | Interference Correction | Cell Gas       |
|--------|------------------|------------------------------------|-------------------|--------------------|-----------------|-------------------------|----------------|
| 1      | 111              | Rh-Tb                              | 0 - 5             | 1/2                | yes             | no                      | no             |
| 2      |                  |                                    |                   |                    |                 |                         |                |
| 3      | 111              | <sup>103</sup> Rh                  | 0 - 10            |                    | yes             | no                      | no             |
| 4      | 111              | <sup>115</sup> In                  | 0 - 25            |                    | yes             | no                      | no             |
| 6      | 111              | no                                 | 0 - 25            | no                 | yes             | no                      | no             |
| 7      | 111              | <sup>103</sup> Rh                  | 0 - 150           |                    | no              | no                      | no             |
| 8      | 111              | Rh                                 | 1 - 25            | 1                  | yes             | no                      | no             |
| 9      | 111              | no                                 |                   |                    |                 | no                      |                |
| 10     | 111              | <sup>115</sup> In                  | 0 - 13            | 1                  | yes             | no                      | no             |
| 11     | 111              | <sup>115</sup> In                  | 1 - 50            | 1                  | yes             | yes                     | no             |
| 13     | 111              | 72                                 |                   | 1                  | yes             | no                      | no             |
| 14     | 111              | Rh                                 | 0 - 10            | 1                  | yes             | no                      | no             |
| 15     | 114              | <sup>103</sup> Rh                  | 0.2 - 25          |                    | no              | no                      | H <sub>2</sub> |
| 16     | 111 (114)        | <sup>89</sup> Y                    | 0 - 10            |                    | yes             | no                      | no             |
| 17     | 111              | Rh                                 | 0 - 40            | 1                  | no              | no                      | no             |
| 18     | 111              | Rh                                 | 0.3 - 20          |                    | yes             | yes                     | no             |
| 19     | 111              | In                                 | 0 - 100           |                    | no              | no                      | no             |
| 21     | 111, 112         |                                    | 1 - 100           |                    |                 |                         |                |
| 22     | 111, 114         | In                                 |                   |                    | yes             | no                      | no             |
| 23     | 111              | <sup>89</sup> Y                    | 0 - 4             | 1                  | no              | no                      | He             |
| 24     | 111              | <sup>115</sup> In                  |                   |                    |                 |                         |                |
| 25     | 111              | <sup>115</sup> In                  | 0.5 - 50          | 1                  |                 | no                      | no             |
| 27     | 114              |                                    | 0.5 - 10          | no                 | yes             | no                      | no             |
| 28     | 111              | In                                 | 0.1 - 5           | no                 | no              | yes                     | no             |
| 30     | 114              | Rh                                 | 1 - 25            | without dilution   | yes             | yes                     | no             |
| 32     | 114              | In                                 | 0 - 25            | 1.075              | yes             | no                      | no             |
| 33     | 111              | Er                                 |                   | 1                  | yes             | no                      | no             |
| 34     | 111              | <sup>89</sup> Y- <sup>115</sup> In | 0.1 - 5           | 10                 | yes             | no                      | no             |
| 35     | 114              | Rh                                 | 0.2 - 10          | 8/25, 12/25, 20/25 | yes             | yes                     | no             |
| 37     | 111              | <sup>115</sup> In                  | 0.25 - 25         |                    | yes             | no                      | low res        |
| 38     | 111              | In                                 | 0.2 - 25          |                    | yes             | yes                     | no             |
| 39     | 111              | Sc, In, Bi                         | 2 - 1200          | 1.25, 1.67, 2.51   | yes             | no                      | no             |
| 40     |                  |                                    |                   |                    |                 |                         |                |
| 41     | 111              | Rh                                 | 0.5 - 5           | 50%                | yes             |                         | no             |
| 42     | 111, 114         | <sup>103</sup> Rh                  | 0.2 - 10          | 1.04               | yes             | yes                     | no             |
| 44     |                  | Rh, Bi                             | 0 - 5             | 3.3                |                 | no                      | H <sub>2</sub> |
| 45     | 114              | Rh                                 | 0.04 - 50         |                    | yes             | yes                     | no             |
| 48     | 111              | Sc                                 | 0 - 24            | ~1                 | yes             | yes                     | no             |
| 49     | 114              | In                                 | 10 - 100          |                    | yes             | yes                     | no             |
| 50     | 114              | Rh                                 | 0.5 - 100         | without dilution   | yes             | yes                     | no             |
| 51     | 111              |                                    | 1 - 20            |                    | no              | no                      | no             |
| 52     | 111, 114         | In                                 | 1 - 100           |                    | yes             | no                      | no             |
| 54     | 111              | Sc, Rh, Pd, Pt, Y                  | 1 - 50            |                    | yes             | no                      | no             |
| 55     | 111              | Sc, In, Tb, Bi                     | 0.5 - 250         | 1                  | yes             | no                      | no             |
| 56     | 111, 112, 114    | 103                                | 1 - 5             | 1.01               | no              | no                      | no             |
| 57     | 111              | <sup>115</sup> In                  | 0 - 0.5           | 1 to 5             | no              | no                      | no             |
| uniovi | 114              | <sup>111</sup> Cd                  | IDA               |                    | yes             | yes                     | no             |

Table SI-8: Copper.

|        | Working Isotopes | Internal Standard                 | Calibration Range | Dilution Factor    | Quality Control | Interference Correction | Cell Gas          |
|--------|------------------|-----------------------------------|-------------------|--------------------|-----------------|-------------------------|-------------------|
| 1      | 65               | Rh-Tb                             | 0 - 20            | 1/2                | yes             | no                      | no                |
| 2      |                  |                                   |                   |                    |                 |                         |                   |
| 3      | 63               | <sup>71</sup> Ga                  | 0 - 200           |                    | yes             | no                      | no                |
| 4      | 63               | <sup>115</sup> In                 | 0 - 25            |                    | yes             | no                      | no                |
| 6      | 63               | no                                | 0 - 200           | no                 | yes             | no                      | no                |
| 7      | 63               | <sup>103</sup> Rh                 | 0 - 200           |                    | no              | no                      | no                |
| 8      | 63               | Rh                                | 25 - 200          | 1                  | yes             | no                      | no                |
| 9      | 63               | no                                |                   |                    |                 | no                      |                   |
| 10     | 63               | <sup>71</sup> Ga                  | 0 - 50            | 1                  | yes             | no                      | no                |
| 11     | 63               | <sup>72</sup> Ge                  | 1 - 50            | 1                  | yes             | no                      | no                |
| 13     | 65               | 72                                |                   | 1                  | yes             | no                      | no                |
| 14     | 65               | Ga                                | 0 - 200           | 1                  | yes             | no                      | no                |
| 15     | 63               | <sup>89</sup> Y                   | 0.2 - 25          |                    | no              | no                      | H <sub>2</sub>    |
| 16     | 63 (65)          | <sup>72</sup> Ge                  | 0 - 100           |                    | yes             | no                      | no                |
| 17     | 63               | Y                                 | 0 - 40            | 1                  | no              | no                      | no                |
| 18     | 63               | Sc                                | 0.3 - 100         |                    | yes             | no                      | no                |
| 19     | 63               | In                                | 0 - 250           |                    | no              | no                      | no                |
| 21     | 63, 65           |                                   | 1 - 100           |                    |                 |                         |                   |
| 22     | 63, 65           | Rh                                |                   |                    | yes             | no                      | no                |
| 23     | 65               | <sup>45</sup> Sc                  | 0 - 80            | 1                  | no              | no                      | He                |
| 24     | 65               | <sup>89</sup> Y                   |                   |                    |                 |                         |                   |
| 25     | 65               | <sup>45</sup> Sc                  | 0.5 - 1000        | 1                  |                 | no                      | no                |
| 27     | 63               |                                   | 1 - 50            | no                 | yes             | no                      | no                |
| 28     | 63, 65           | In                                | 0.1 - 25          | no                 | no              | no                      | no                |
| 30     | 63               | Rh                                | 1 - 100           | without dilution   | yes             | no                      |                   |
| 32     | 65               | In                                | 0 - 100           | 1.075              | yes             | no                      | no                |
| 33     | 63               | Er                                |                   | 1                  | yes             | no                      | no                |
| 34     | 65               | <sup>45</sup> Sc- <sup>89</sup> Y | 0.1 - 10          | 10                 | yes             | no                      | no                |
| 35     | 63               | Rh                                | 5 - 100           | 8/25, 12/25, 20/25 | yes             | no                      | no                |
| 37     | 65               | <sup>45</sup> Sc                  | 1 - 100           |                    | yes             | no                      | med res           |
| 38     | 63               | In                                | 0.5 - 100         |                    | yes             | no                      | no                |
| 39     | 63               | Sc, In, Bi                        | 28 - 16000        | 1.25, 1.67, 2.51   | yes             | no                      | He/H <sub>2</sub> |
| 40     | 65               | Rh                                | 1 - 50            | 2                  | yes             |                         | no                |
| 41     | 65               | Rh                                | 2 - 20            | 50%                | yes             | no                      | no                |
| 42     | 63               | <sup>103</sup> Rh                 | 2 - 100           | 1.04               | yes             | no                      | no                |
| 44     | 63, 65           | Rh                                | 0 - 52            | 3.3                | ----            | no                      | no                |
| 45     | 63               | Rh                                | 0.2 - 150         |                    | yes             | no                      | no                |
| 48     | 63               | Sc                                | 0 - 23            | ~1                 | yes             | no                      | no                |
| 49     | 65               | Ge                                | 10 - 100          |                    | yes             |                         | no                |
| 50     | 63, 65           | Ge                                | 0.5 - 100         | without dilution   | yes             | no                      | no                |
| 51     | 63               |                                   | 1 - 100           |                    | no              | no                      | no                |
| 52     | 63, 65           | Ga                                | 1 - 100           |                    | yes             | no                      | no                |
| 54     | 63               | Sc, Rh, Pd, Pt, Y                 | 1 - 50            |                    | yes             | no                      | no                |
| 55     | 65               | Sc, In, Tb, Bi                    | 0.5 - 250         | 1                  | yes             | no                      | no                |
| 56     | 63, 65           | 89                                | 1 - 50            | 1.01               | no              | no                      | no                |
| 57     |                  |                                   |                   |                    |                 |                         |                   |
| uniovi | 63               | <sup>65</sup> Cu                  | IDA               |                    | yes             | no                      | no                |

Table SI-9: Chromium.

| Lab    | Working Isotopes | Internal Standard                 | Calibration Range | Dilution Factor    | Quality Control | Interference Correction | Cell Gas          |
|--------|------------------|-----------------------------------|-------------------|--------------------|-----------------|-------------------------|-------------------|
| 1      | 52               | Rh-Tb                             | 0 - 10            | 1/2                | yes             | no                      | no                |
| 2      |                  |                                   |                   |                    |                 |                         |                   |
| 3      | 52               | <sup>71</sup> Ga                  | 0 - 50            |                    | yes             | no                      | no                |
| 4      | 53               | <sup>115</sup> In                 | 0 - 25            |                    | yes             | no                      | no                |
| 6      | 52               | no                                | 0 - 25            | no                 | yes             | no                      | no                |
| 7      | 53               | <sup>103</sup> Rh                 | 0 - 150           |                    | no              | no                      | no                |
| 8      | 53               | Rh                                | 1 - 25            | 1                  | yes             | no                      | no                |
| 9      | 53               | no                                |                   |                    |                 | no                      |                   |
| 10     | 53               | <sup>71</sup> Ga                  | 0 - 50            | 1                  | yes             | no                      | no                |
| 11     | 53               | <sup>45</sup> Sc                  | 1 - 50            | 1                  | yes             | no                      | no                |
| 13     | 53               | 45                                |                   | 1                  | yes             | no                      | no                |
| 14     | 52               | Ga                                | 0 - 50            | 1                  | yes             | no                      | no                |
| 15     | 52               | <sup>89</sup> Y                   | 0.2 - 25          |                    | no              | no                      | H <sub>2</sub>    |
| 16     | 52 (53)          | <sup>45</sup> Sc                  | 0 - 10            |                    | yes             | no                      | no                |
| 17     | 53               | Y                                 | 0 - 40            | 1                  | no              | no                      | no                |
| 18     | 53               | Sc                                | 0.3 - 50          |                    | yes             | no                      | no                |
| 19     | 53               | In                                | 0 - 250           |                    | no              | no                      | no                |
| 21     | 52, 53           |                                   | 1 - 100           |                    |                 |                         |                   |
| 22     | 53               | Rh                                |                   |                    | yes             | no                      | no                |
| 23     | 53               | <sup>45</sup> Sc                  | 0 - 8             | 1                  | no              | no                      | He                |
| 24     | 52               | <sup>89</sup> Y                   |                   |                    |                 |                         |                   |
| 25     | 52               | <sup>45</sup> Sc                  | 0.5 - 50          | 1                  |                 | no                      | no                |
| 27     | 52               |                                   | 1 - 20            | no                 | yes             | no                      | no                |
| 28     | 52               | In                                | 0.1 - 25          | no                 | no              | no                      | CH <sub>4</sub>   |
| 30     | 52               | Rh                                | 1 - 25            | without dilution   | yes             | no                      |                   |
| 32     | 52               | In                                | 0 - 25            | 1.075              | yes             | no                      | no                |
| 33     | 53               | Er                                |                   | 1                  | yes             | no                      | no                |
| 34     | 52               | <sup>45</sup> Sc- <sup>89</sup> Y | 0.1 - 5           | 10                 | yes             | no                      | no                |
| 35     | 52               | Rh                                |                   | 8/25, 12/25, 20/25 | yes             | no                      | no                |
| 37     | 52               | <sup>72</sup> Ge                  | 0.25 - 25         |                    | yes             | no                      | low res           |
| 38     | 53               | In                                | 0.5 - 50          |                    | yes             | no                      | no                |
| 39     | 52               | Sc, In, Bi                        | 8 - 5000          | 1.25, 1.67, 2.51   | yes             | no                      | He/H <sub>2</sub> |
| 40     | 53               | Rh                                | 1 - 10            | 2                  | yes             |                         | no                |
| 41     | 52               | Tl                                |                   | 50%                | no              | no                      | He/H <sub>2</sub> |
| 42     | 52, 53           | <sup>103</sup> Rh                 | 1 - 50            | 1.04               | yes             | no                      | no                |
| 44     | 52, 53           | Rh                                | 0 - 52            | 3.3                | yes             |                         | no                |
| 45     | 53               | Rh                                | 0.08 - 100        |                    | yes             | yes                     | no                |
| 48     | 52               | Sc                                | 0 - 96            | ~1                 | yes             | no                      | no                |
| 49     | 53               |                                   | 10 - 100          |                    |                 |                         | NH <sub>3</sub>   |
| 50     | 50, 52, 53       | Ge                                | 0.5 - 100         | without dilution   | yes             | yes                     | no                |
| 51     | 53               |                                   | 1 - 40            |                    | no              | no                      | no                |
| 52     | 52, 53           | Ga                                | 1 - 100           | 1:10               | yes             | no                      | no                |
| 54     | 52               | Sc, Rh, Pd, Pt, Y                 | 1 - 50            |                    | yes             | no                      | no                |
| 55     | 52               | Sc, In, Tb, Bi                    | 0.5 - 250         | 1                  | yes             | no                      | no                |
| 56     | 50, 52, 53       | 89                                | 1 - 25            | 1.01               | no              | no                      | no                |
| 57     | 53               | <sup>71</sup> Ga                  | 0 - 5             | 1 to 5             | no              | no                      | no                |
| uniovi | 52               | <sup>53</sup> Cr                  | IDA               |                    | yes             | no                      | H <sub>2</sub>    |

Table SI-10: Iron.

|        | Working Isotopes | Internal Standard                 | Calibration Range | Dilution Factor  | Quality Control | Interference Correction | Cell Gas           |
|--------|------------------|-----------------------------------|-------------------|------------------|-----------------|-------------------------|--------------------|
| 1      | 54               | Rh-Tb                             | 0 - 100           | 1/2              | yes             | yes                     | no                 |
| 2      |                  |                                   |                   |                  |                 |                         |                    |
| 3      | 54               | <sup>71</sup> Ga                  | 0 - 200           |                  | yes             | yes                     | no                 |
| 4      | 56               |                                   | 0 - 100           |                  | yes             | no                      | no                 |
| 6      | 54               | no                                | 0 - 200           | no               | yes             | no                      | no                 |
| 7      | 56               | <sup>103</sup> Rh                 | 0 - 200           |                  | no              | no                      | no                 |
| 8      | 54               | Rh                                | 25 - 200          | 1                | yes             | yes                     | no                 |
| 9      | 57               | no                                |                   |                  |                 | no                      |                    |
| 10     | 54               | <sup>71</sup> Ga                  | 0 - 50            | 1                | yes             | no                      | no                 |
| 11     | 57               | <sup>45</sup> Sc                  | 10 - 500          | 1                | yes             | no                      | no                 |
| 13     | 54               | 72                                |                   | 1                | yes             | no                      | no                 |
| 14     | 54               | Sc                                | 0 - 200           | 1                | yes             | yes                     | no                 |
| 15     | 56               | <sup>89</sup> Y                   | 0.2 - 25          |                  | no              | no                      | H <sub>2</sub>     |
| 16     | 54 (56, 57)      | <sup>45</sup> Sc                  | 0 - 50            |                  | yes             | no                      | no                 |
| 17     | 57               | Y                                 | 0 - 40            | 1                | no              | no                      | no                 |
| 18     | 57               | Sc                                | 30 - 2000         |                  | yes             | no                      | no                 |
| 19     | 57               |                                   | 1 - 100           |                  | no              | no                      | no                 |
| 21     |                  |                                   |                   |                  |                 |                         |                    |
| 22     |                  |                                   |                   |                  |                 |                         |                    |
| 23     | 56               | <sup>45</sup> Sc                  | 0 - 80            | 1                | no              | no                      | He                 |
| 24     | 57               | <sup>89</sup> Y                   |                   |                  |                 |                         |                    |
| 25     |                  |                                   |                   | 1                |                 |                         |                    |
| 27     | 57               |                                   | 10 - 200          | no               | yes             | no                      | no                 |
| 28     | 56               | In                                | 0.1 - 50          | no               | no              | no                      | CH <sub>4</sub>    |
| 30     | 57               | Rh                                | 1 - 200           | without dilution | yes             | no                      | no                 |
| 32     |                  |                                   |                   |                  |                 |                         |                    |
| 33     | 56               | Er                                |                   | 1                | yes             | no                      | no                 |
| 34     | 56               | <sup>45</sup> Sc- <sup>89</sup> Y | 0.1 - 10          | 10               | yes             | no                      | no                 |
| 35     |                  |                                   |                   |                  |                 |                         |                    |
| 37     | 56               | <sup>45</sup> Sc                  | 1 - 100           |                  | yes             | no                      | med res            |
| 38     |                  |                                   |                   |                  |                 |                         |                    |
| 39     | 54               | Sc, In, Bi                        | 8 - 5000          | 1.25, 1.67, 2.51 | yes             | no                      | H <sub>2</sub> /He |
| 40     | 57               | Rh                                | 10 - 50           | 2                | no              |                         | no                 |
| 41     | 56               | <sup>205</sup> Tl                 | 5 - 100           | 50%              | no              | no                      | He/H <sub>2</sub>  |
| 42     |                  |                                   |                   |                  |                 |                         |                    |
| 44     |                  |                                   |                   |                  |                 |                         |                    |
| 45     | 57               | Rh                                | 0 - 1000          |                  | yes             | yes                     | no                 |
| 48     | 57               | Sc                                | 0 - 96            | ~1               | yes             | no                      | no                 |
| 49     |                  |                                   |                   |                  |                 |                         |                    |
| 50     | 54               | Ge                                | 10 - 50           | without dilution | yes             | yes                     | no                 |
| 51     | 57               |                                   | 1 - 100           |                  | no              | no                      | no                 |
| 52     | 54               | Ga                                | 1 - 100           | 1                | yes             | no                      | no                 |
| 54     | 57               | Sc, Rh, Pd, Pt, Y                 | 10 - 100          |                  | yes             | no                      | no                 |
| 55     | 56               | Sc, In, Tb, Bi                    | 0.5 - 250         | 1                | yes             | no                      | no                 |
| 56     | 54, 56, 57       | <sup>89</sup> Y                   | 1 - 50            | 1.01             | no              | no                      | no                 |
| 57     | 54               | <sup>71</sup> Ga                  | 0 - 20            | 1 to 5           | no              | no                      | no                 |
| uniovi | 56               | <sup>57</sup> Fe                  | IDA               |                  | yes             | no                      | H <sub>2</sub>     |

Table SI-11: Manganese.

| Lab    | Working Isotopes | Internal Standard                 | Calibration Range | Dilution Factor    | Quality Control | Interference Correction | Cell Gas          |
|--------|------------------|-----------------------------------|-------------------|--------------------|-----------------|-------------------------|-------------------|
| 1      | 55               | Rh-Tb                             | 0 - 10            | 1/2                | yes             | no                      | no                |
| 2      |                  |                                   |                   |                    |                 |                         |                   |
| 3      | 55               | <sup>71</sup> Ga                  | 0 - 50            |                    | yes             | no                      | no                |
| 4      | 55               | <sup>115</sup> In                 | 0 - 25            |                    | yes             | no                      | no                |
| 6      | 55               | no                                | 0 - 200           | no                 | yes             | no                      | no                |
| 7      | 55               | <sup>103</sup> Rh                 | 0 - 200           |                    | no              | no                      | no                |
| 8      | 55               | Rh                                | 1 - 25            | 1                  | yes             | no                      | no                |
| 9      | 55               | no                                |                   |                    |                 | no                      |                   |
| 10     | 55               | <sup>71</sup> Ga                  | 0 - 50            | 1                  | yes             | no                      | no                |
| 11     | 55               | <sup>45</sup> Sc                  | 1 - 50            | 1                  | yes             | no                      | no                |
| 13     | 55               | 45                                |                   | 1                  | yes             | no                      | no                |
| 14     | 55               | Ga                                | 0 - 50            | 1                  | yes             | no                      | no                |
| 15     | 55               | <sup>89</sup> Y                   | 0.2 - 25          |                    | no              | no                      | H <sub>2</sub>    |
| 16     | 55               | <sup>45</sup> Sc                  | 0 - 50            |                    | yes             | no                      | no                |
| 17     | 55               | Y                                 | 0 - 40            | 1                  | no              | no                      | no                |
| 18     | 55               | Sc                                | 0.3 - 50          |                    | yes             | no                      | no                |
| 19     | 55               | In                                | 0 - 250           |                    | no              | no                      | no                |
| 21     | 55               |                                   | 1 - 100           |                    | no              |                         |                   |
| 22     | 55               | Rh                                |                   |                    | yes             | no                      | no                |
| 23     | 55               | <sup>45</sup> Sc                  | 0 - 80            | 1                  | no              | no                      | He                |
| 24     | 55               | <sup>89</sup> Y                   |                   |                    |                 |                         |                   |
| 25     | 55               | <sup>45</sup> Sc                  | 0.5 - 100         | 1                  |                 | no                      | no                |
| 27     | 55               |                                   | 1 - 50            | no                 | yes             | no                      | no                |
| 28     | 55               | In                                | 0.1 - 25          | no                 | no              | no                      | no                |
| 30     | 55               | Rh                                | 1 - 100           | without dilution   | yes             | no                      | no                |
| 32     | 55               | In                                | 0 - 100           | 1.075              | yes             | no                      | no                |
| 33     | 55               | Er                                |                   | 1                  | yes             | no                      | no                |
| 34     | 55               | <sup>45</sup> Sc- <sup>89</sup> Y | 0.1 - 10          | 10                 | yes             | no                      | no                |
| 35     | 55               | <sup>103</sup> Rh                 | 0.5 - 50          | 8/25, 12/25, 20/25 | yes             | no                      | no                |
| 37     | 55               | Ge                                | 1 - 100           |                    | yes             | no                      | low res           |
| 38     | 55               | <sup>115</sup> In                 | 0.1 - 50          |                    |                 | no                      | no                |
| 39     | 55               | Sc, In, Bi                        | 8 - 5000          | 1.25, 1.67, 2.51   | yes             | no                      | He/H <sub>2</sub> |
| 40     | 55               | Rh                                | 1 - 10            | 2                  | no              |                         | no                |
| 41     | 55               | Rh                                | 2 - 20            | 50%                | yes             | no                      | He/H <sub>2</sub> |
| 42     | 55               | <sup>103</sup> Rh                 | 0.5 - 50          | 1.04               | yes             | no                      | no                |
| 44     | 55               | Rh                                | 0 - 52            | 3.33               | yes             | no                      | no                |
| 45     | 55               | Rh                                | 0.12 - 150        |                    | yes             | no                      | no                |
| 48     | 55               | Sc                                | 0 - 96            | ~1                 | yes             | yes                     | no                |
| 49     | 55               | Sc                                | 10 - 100          |                    | yes             |                         | no                |
| 50     | 55               | Ge                                | 0.5 - 100         | without dilution   | yes             | no                      | no                |
| 51     | 55               |                                   | 1 - 100           |                    | no              | no                      | no                |
| 52     | 55               | Ga                                | 1 - 100           |                    | yes             | no                      | no                |
| 54     | 55               | Sc, Rh, Pd, Pt, Y                 | 1 - 50            |                    | yes             | no                      | no                |
| 55     | 55               | Sc, In, Tb, Bi                    | 0.5 - 250         | 1                  | yes             | no                      | no                |
| 56     | 55               | 89                                | 1 - 25            | 1.01               | no              | no                      | no                |
| 57     | 55               | <sup>71</sup> Ga                  | 0 - 20            | 1 to 5             | no              | no                      | no                |
| uniovi | 55               | <sup>71</sup> Ga                  | 0 - 20            |                    | yes             | no                      | H <sub>2</sub>    |

Table SI-12: Nickel.

|        | Working Isotopes | Internal Standard                 | Calibration Range | Dilution Factor    | Quality Control | Interference Correction | Cell Gas        |
|--------|------------------|-----------------------------------|-------------------|--------------------|-----------------|-------------------------|-----------------|
| 1      | 60               | Rh-Tb                             | 0 - 20            | 1/2                | yes             | no                      | no              |
| 2      |                  |                                   |                   |                    |                 |                         |                 |
| 3      | 62               | <sup>71</sup> Ga                  | 0 - 20            |                    | yes             | no                      | no              |
| 4      | 60               | <sup>115</sup> In                 | 0 - 25            |                    | yes             | no                      | no              |
| 6      | 60               | no                                | 0 - 25            | no                 | yes             | no                      | no              |
| 7      | 60               | <sup>103</sup> Rh                 | 0 - 150           |                    | no              | no                      | no              |
| 8      | 60               | Rh                                | 1 - 25            | 1                  | yes             | no                      | no              |
| 9      | 60               | no                                |                   |                    |                 | no                      |                 |
| 10     | 60               | <sup>71</sup> Ga                  | 0 - 50            | 1                  | yes             | no                      | no              |
| 11     | 60               | <sup>45</sup> Sc                  | 1 - 50            | 1                  | yes             | no                      | no              |
| 13     | 60               | 72                                |                   | 1                  | yes             | no                      | no              |
| 14     | 62               | Ga                                | 0 - 50            | 1                  | yes             | no                      | no              |
| 15     | 58               | <sup>89</sup> Y                   | 0.2 - 25          |                    | no              | no                      | H <sub>2</sub>  |
| 16     | 60 (62)          | <sup>72</sup> Ge                  | 0 - 10            |                    | yes             | no                      | no              |
| 17     | 60               | Y                                 | 0 - 40            | 1                  | no              | no                      | no              |
| 18     | 60               | Sc                                | 0.3 - 50          |                    | yes             | no                      | no              |
| 19     | 60               | In                                | 0 - 250           |                    | no              | no                      | no              |
| 21     | 60               |                                   | 1 - 100           |                    | no              |                         |                 |
| 22     | 58, 60           | Rh                                |                   |                    | yes             | no                      | no              |
| 23     | 60               | <sup>45</sup> Sc                  | 0 - 8             | 1                  | no              | no                      | He              |
| 24     | 60               | <sup>89</sup> Y                   |                   |                    |                 |                         |                 |
| 25     |                  |                                   |                   |                    |                 |                         |                 |
| 27     | 60               |                                   | 1 - 10            | no                 | yes             | no                      | no              |
| 28     | 62               | In                                | 0.1 - 10          | no                 | no              | no                      | no              |
| 30     | 60               | Rh                                | 1 - 25            | without dilution   | yes             | no                      |                 |
| 32     | 62               | In                                | 0 - 25            |                    | yes             | no                      | no              |
| 33     | 60               | Er                                |                   | 1                  | yes             | no                      | no              |
| 34     | 60               | <sup>45</sup> Sc- <sup>89</sup> Y | 0.1 - 5           | 10                 | yes             | no                      | no              |
| 35     | 58               | Rh                                | 1 - 20            | 8/25, 12/25, 20/25 | yes             | yes                     | no              |
| 37     | 60               | <sup>45</sup> Sc                  | 0.25 - 25         |                    | yes             | no                      | med res         |
| 38     |                  |                                   |                   |                    |                 |                         |                 |
| 39     | 60               | Sc, In, Bi                        | 2 - 1200          | 1.25, 1.67, 2.51   | yes             | no                      | no              |
| 40     | 62               | Rh                                | 1 - 10            | 2                  | yes             |                         | no              |
| 41     | 60               | Rh                                | 1 - 15            | 50%                | yes             | no                      | no              |
| 42     | 60               | <sup>103</sup> Rh                 | 0.5 - 30          | 1.04               | yes             | no                      | no              |
| 44     | 60, 62           | Rh                                | 0 - 10            | 3.3                | yes             | no                      | no              |
| 45     | 60               | Rh                                | 0.32 - 400        |                    | yes             | yes                     | no              |
| 48     | 60               | Sc                                | 0 - 23            | ~1                 | yes             | no                      | no              |
| 49     | 58               | Ge                                | 10 - 100          |                    | yes             | yes                     | NH <sub>3</sub> |
| 50     | 60, 62           | Ge                                | 0.5 - 100         | without dilution   | yes             | no                      | no              |
| 51     | 60               |                                   | 1 - 40            |                    | no              | no                      | no              |
| 52     | 60, 62           | Ga                                | 1 - 100           |                    | yes             | no                      | no              |
| 54     | 60               | Sc, Rh, Pd, Pt, Y                 | 1 - 50            |                    | yes             | no                      | no              |
| 55     | 60, 62           | Sc, In, Tb, Bi                    | 0.5 - 250         | 1                  | yes             | no                      | no              |
| 56     | 58, 60, 62       | 89                                | 1 - 25            | 1.01               | no              | no                      | no              |
| 57     | 60               | <sup>71</sup> Ga                  | 0 - 2.5           | 1 to 5             | no              | no                      | no              |
| uniovi | 60               | <sup>61</sup> Ni                  | IDA               |                    | yes             | no                      | no              |

Table SI-13: Lead.

|        | Working Isotopes | Internal Standard                   | Calibration Range | Dilution Factor    | Quality Control | Interference Correction | Cell Gas       |
|--------|------------------|-------------------------------------|-------------------|--------------------|-----------------|-------------------------|----------------|
| 1      | 208              | Rh-Tb                               | 0 - 10            | 1/2                | yes             | no                      | no             |
| 2      |                  |                                     |                   |                    |                 |                         |                |
| 3      | 208              | <sup>205</sup> Tl                   | 0 - 20            |                    | yes             | no                      | no             |
| 4      | 208              | <sup>115</sup> In                   | 0 - 25            |                    | yes             | no                      | no             |
| 6      | 208              | no                                  | 0 - 25            | no                 | yes             | no                      | no             |
| 7      | 208              | <sup>205</sup> Tl                   | 0 - 150           |                    | no              | no                      | no             |
| 8      | 208              | <sup>185</sup> Re                   | 1 - 25            | 1                  | yes             | no                      | no             |
| 9      | 208              | no                                  |                   |                    |                 | no                      |                |
| 10     | 208              | <sup>205</sup> Tl                   | 0 - 50            | 1                  | yes             | no                      | no             |
| 11     | 208              | <sup>209</sup> Bi                   | 0 - 50            | 1                  | yes             | yes                     | no             |
| 13     | 208              | 159                                 |                   | 1                  | yes             | no                      | no             |
| 14     | 208              | Bi                                  | 0 - 50            | 1                  | yes             | no                      | no             |
| 15     | 208              | <sup>185</sup> Re                   | 0.2 - 25          |                    | no              | no                      | H <sub>2</sub> |
| 16     | 208 (206)        | <sup>159</sup> Tb                   | 0 - 10            |                    | yes             | no                      | no             |
| 17     | 208              | Th                                  | 0 - 40            | 1                  | no              | no                      | no             |
| 18     | 208              | Tb                                  | 0.3 - 20          |                    | yes             | yes                     | no             |
| 19     | 208              | In                                  | 0 - 250           |                    | no              | no                      | no             |
| 21     | 206, 208         |                                     | 1 - 100           |                    | no              |                         |                |
| 22     | 206, 208         | Tl                                  |                   |                    | yes             | no                      | no             |
| 23     | 206              | <sup>209</sup> Bi                   | 0 - 8             | 1                  | no              | no                      | He             |
| 24     | 206, 207, 208    | <sup>159</sup> Tb                   |                   |                    |                 |                         |                |
| 25     | 208              | <sup>185</sup> Re                   | 0.5 - 100         | 1                  |                 | no                      | no             |
| 27     | 208              |                                     | 1 - 10            | no                 | yes             | no                      | no             |
| 28     | 208              | In                                  | 0.1 - 10          | no                 | no              | no                      | no             |
| 30     | 208              | Rh                                  | 1 - 25            | without dilution   | yes             | yes                     | no             |
| 32     | 206, 207, 208    | Bi                                  | 0 - 25            | 1.075              | yes             | no                      | no             |
| 33     | 208              | Er                                  |                   | 1                  | yes             | no                      | no             |
| 34     | 206, 207, 208    | <sup>165</sup> Ho- <sup>209</sup> B | 0.1 - 5           | 10                 | yes             | yes                     | no             |
| 35     | 206              | Rh                                  | 0.5 - 10          | 8/25, 12/25, 20/25 | yes             | no                      | no             |
| 37     | 206, 207, 208    | <sup>205</sup> Tl                   | 0.25 - 25         |                    | yes             | yes                     | low res        |
| 38     | 208              | In                                  | 0.5 - 10          |                    | yes             | yes                     | no             |
| 39     | 206, 207, 208    | Sc, In, Bi                          | 2 - 1200          | 1.25, 1.67, 2.51   | yes             | yes                     | no             |
| 40     | 208              | Rh                                  | 1 - 10            | 2                  | no              |                         | no             |
| 41     | 208              | Tl                                  | 1 - 10            | 50%                | yes             | no                      | no             |
| 42     | 206, 207, 208    | <sup>103</sup> Rh                   | 1 - 50            | 1.04               | yes             | yes                     | no             |
| 44     | 206, 207, 208    | Bi                                  | 0 - 5             | 3.3                |                 | yes                     | no             |
| 45     | 208              | Re                                  | 0.024 - 30        |                    | yes             | yes                     | no             |
| 48     | 206, 207, 208    | Sc                                  | 0 - 24            | ~1                 | yes             | no                      | no             |
| 49     | 208              | Bi                                  | 10 - 100          |                    | yes             |                         | no             |
| 50     | 206, 207, 208    | Re                                  | 0.5 - 100         | without dilution   | yes             | yes                     | no             |
| 51     | 208              |                                     | 1 - 20            |                    | no              | no                      | no             |
| 52     | 206, 208         | In                                  | 1 - 100           |                    | yes             | no                      | no             |
| 54     | 208              | Sc, Rh, Pd, Pt, Y                   | 1 - 50            |                    | yes             | no                      | no             |
| 55     | 208              | <sup>209</sup> Bi                   | 0.5 - 250         | 1                  | yes             | yes                     | no             |
| 56     | 206, 207, 208    | 103                                 | 1 - 5             | 1.01               | no              | no                      | no             |
| 57     | 208              | <sup>205</sup> Tl                   | 0 - 2.5           | 1 to 5             | no              | no                      | no             |
| uniovi | 208              | <sup>207</sup> Pb                   | IDA               |                    | yes             | no                      | no             |

Table SI-14: Selenium.

|        | Working Isotopes | Internal Standard                 | Calibration Range | Dilution Factor    | Quality Control | Interference Correction | Cell Gas           |
|--------|------------------|-----------------------------------|-------------------|--------------------|-----------------|-------------------------|--------------------|
| 1      | 82               | Rh-Tb                             | 0 - 20            | 1/2                | yes             | yes                     |                    |
| 2      |                  |                                   |                   |                    |                 |                         |                    |
| 3      | 82               | <sup>71</sup> Ga                  | 0 - 20            |                    | yes             | no                      | no                 |
| 4      | 82               | <sup>115</sup> In                 | 0 - 25            |                    | yes             | no                      | no                 |
| 6      | 82               | no                                | 0 - 25            | no                 | yes             | no                      | no                 |
| 7      | 82               | <sup>103</sup> Rh                 | 0 - 150           |                    | no              | no                      | no                 |
| 8      | 82               | Rh                                | 1 - 25            | 1                  | yes             | no                      | no                 |
| 9      | 82               | no                                |                   |                    |                 | no                      |                    |
| 10     | 77               | <sup>89</sup> Y                   | 0 - 13            | 1                  | yes             | no                      | no                 |
| 11     | 82               | <sup>72</sup> Ge                  | 1 - 50            | 1                  | yes             | yes                     | no                 |
| 13     | 82               | 72                                |                   | 1                  | yes             | no                      | no                 |
| 14     | 82               | Ga                                | 0 - 20            | 1                  | yes             | no                      | no                 |
| 15     |                  |                                   |                   |                    |                 |                         |                    |
| 16     | 82 (77)          | <sup>89</sup> Y                   | 0 - 10            |                    | yes             | no                      | no                 |
| 17     |                  |                                   |                   |                    |                 |                         |                    |
| 18     | 82               | Y                                 | 0.3 - 20          |                    | yes             | no                      | no                 |
| 19     | 82               | In                                | 0 - 100           |                    | no              | no                      | no                 |
| 21     | 77               |                                   | 1 - 100           |                    | no              |                         |                    |
| 22     | 77, 82           | Rh                                |                   |                    | yes             | no                      | no                 |
| 23     | 82               | <sup>89</sup> Y                   | 0 - 8             | 1                  | no              | no                      | He                 |
| 24     | 78               | <sup>89</sup> Y                   |                   |                    |                 | yes                     |                    |
| 25     | 82               | <sup>115</sup> In                 | 0.5 - 50          | 1                  |                 | no                      | no                 |
| 27     | 82               |                                   | 1 - 10            | no                 | yes             | no                      | no                 |
| 28     | 80               | In                                | 0.1 - 10          | no                 | no              | yes                     | CH <sub>4</sub>    |
| 30     |                  |                                   |                   |                    |                 |                         |                    |
| 32     | 77               | In                                | 0 - 120           | 1.075              | yes             | no                      | no                 |
| 33     | 82               | Er                                |                   | 1                  |                 | no                      | no                 |
| 34     | 82               | <sup>45</sup> Sc- <sup>89</sup> Y | 0.1 - 5           | 10                 | yes             | no                      | no                 |
| 35     | 82               | Rh                                | 0.5 - 10          | 8/25, 12/25, 20/25 | yes             | yes                     | no                 |
| 37     | 82               | <sup>72</sup> Ge                  | 0.25 - 25         |                    | yes             | yes                     | low res            |
| 38     | 82               | In                                | 1 - 25            |                    | yes             | no                      | no                 |
| 39     | 80               | Sc, In, Bi                        | 2 - 1200          | 1.25, 1.67, 2.51   | yes             | no                      | H <sub>2</sub> /He |
| 40     | 77               | Rh                                | 1 - 10            | 2                  | yes             |                         | no                 |
| 41     | 80               |                                   | 0.5 - 8           | 50%                | yes             |                         | He/H <sub>2</sub>  |
| 42     | 82               | <sup>103</sup> Rh                 | 0.2 - 30          | 1.04               | yes             | yes                     | no                 |
| 44     | 77, 82           | Rh                                | 0 - 5             | 3.3                | ----            | no                      | H <sub>2</sub>     |
| 45     | 77               | Rh                                | 0.08 - 100        |                    | yes             |                         | no                 |
| 48     | 82               | Sc                                | 0 - 96            | ~1                 | yes             | yes                     | no                 |
| 49     | 82               | Ge                                | 10 - 100          |                    | yes             | yes                     | no                 |
| 50     | 80               | Ge                                | 0.5 - 100         | without dilution   | yes             | yes                     | no                 |
| 51     | 82               |                                   | 1 - 20            |                    | no              | no                      | no                 |
| 52     | 77, 78, 82       | Ga                                | 1 - 100           | 1:01               | yes             | no                      | no                 |
| 54     | 78               | Sc, Rh, Pd, Pt, Y                 | 1 - 50            |                    | yes             | yes                     | no                 |
| 55     | 82               | Sc, In, Tb, Bi                    | 0.5 - 250         | 1                  | yes             | yes                     | no                 |
| 56     | 78, 82           | 89                                | 1 - 25            | 1.01               | no              | no                      | no                 |
| 57     | 82               | <sup>103</sup> Rh                 | 0 - 5             | 1 to 5             | no              | no                      | no                 |
| uniovi | 80               | <sup>77</sup> Se                  | IDA               |                    | yes             | no                      | no                 |



Table SI-15: Strontium.

|        | Working Isotopes | Internal Standard                 | Calibration Range | Dilution Factor    | Quality Control | Interference Correction | Cell Gas          |
|--------|------------------|-----------------------------------|-------------------|--------------------|-----------------|-------------------------|-------------------|
| 1      | 88               | Rh-Tb                             | 0 - 50            | 1/2                | yes             | no                      | no                |
| 2      |                  |                                   |                   |                    |                 |                         |                   |
| 3      |                  |                                   |                   |                    |                 |                         |                   |
| 4      | 88               | <sup>115</sup> In                 | 0 - 25            |                    | yes             | no                      | no                |
| 6      | 86               | no                                | 0 - 200           | no                 | yes             | no                      | no                |
| 7      | 88               | <sup>103</sup> Rh                 | 0 - 500           |                    | no              | no                      | no                |
| 8      | 88               | Rh                                | 200 - 2000        | 1                  | yes             | no                      | no                |
| 9      | 88               | no                                |                   |                    |                 | no                      |                   |
| 10     |                  |                                   |                   |                    |                 |                         |                   |
| 11     |                  |                                   |                   |                    |                 |                         |                   |
| 13     | 88               | 72                                |                   | 1                  | yes             | no                      | no                |
| 14     |                  |                                   |                   |                    |                 |                         |                   |
| 15     | 88               | <sup>89</sup> Y                   | 0.2 - 25          |                    | no              | no                      | H <sub>2</sub>    |
| 16     | 88 (86)          | <sup>89</sup> Y                   | 0 - 2000          |                    | yes             | no                      | no                |
| 17     | 88               | Y                                 | 0 - 40            | 84                 | no              | no                      | no                |
| 18     | 88               | Y                                 | 0.3 - 400         | 10                 | yes             | no                      | no                |
| 19     | 88               | In                                | 0 - 2000          |                    | no              | no                      | no                |
| 21     | 88               | no                                | 1 - 100           |                    | no              |                         |                   |
| 22     | 88               | Rh                                |                   |                    | yes             | no                      | no                |
| 23     | 88               | <sup>89</sup> Y                   | 0 - 2000          | 1                  | no              | no                      | He                |
| 24     | 88               | <sup>89</sup> Y                   |                   |                    |                 |                         |                   |
| 25     | 88               | <sup>115</sup> In                 | 0.5 - 1000        | 1 to 20            | ----            | no                      | no                |
| 27     | 88               |                                   | 100 - 2000        | no                 | yes             | no                      | no                |
| 28     | 88               | In                                | 50 - 500          | 1:1                | no              | no                      | no                |
| 30     | 88               | <sup>103</sup> Rh                 | 50 - 2000         | without dilution   | yes             | no                      | no                |
| 32     |                  | In                                | 0 - 120           | 1.075              | yes             | no                      | no                |
| 33     |                  |                                   |                   |                    |                 |                         |                   |
| 34     | 88               | <sup>45</sup> Sc- <sup>89</sup> Y | 0.1 - 100         | 10                 | yes             | no                      | no                |
| 35     | 86               | Rh                                | 1 - 100           | 8/25, 12/25, 20/25 | no              | yes                     | no                |
| 37     | 88               | <sup>89</sup> Y                   | 20 - 2000         |                    | yes             | yes                     | med res           |
| 38     | 86               | In                                | 0.1 - 1200        |                    | yes             | no                      | no                |
| 39     | 88               | Sc, In, Bi                        | 2 - 1200          | 1.25, 1.67, 2.51   | yes             | no                      | no                |
| 40     | 88               | Rh                                | 50 - 1000         | 2                  | no              |                         | no                |
| 41     | 88               | Tl                                | 50 - 500          | 50%                | no              | no                      | He/H <sub>2</sub> |
| 42     |                  |                                   |                   |                    |                 |                         |                   |
| 44     |                  |                                   |                   |                    |                 |                         |                   |
| 45     |                  |                                   |                   |                    |                 |                         |                   |
| 48     | 88               | Sc                                | 0 - 1930          | ~1                 | yes             | no                      | no                |
| 49     |                  |                                   |                   |                    |                 |                         |                   |
| 50     | 88               | Ge                                | 10 - 500          | 1:10               | yes             | no                      | no                |
| 51     | 88               |                                   | 100 - 1000        |                    | no              | no                      | no                |
| 52     | 86, 88           | Ga                                | 1 - 100           | 1:50               | yes             | no                      | no                |
| 54     | 88               | Sc, Rh, Pd, Pt, Y                 | 1 - 200           |                    | yes             | no                      | no                |
| 55     | 88               | Sc, In, Tb, Bi                    | 0.5 - 250         | 1                  | yes             | no                      | no                |
| 56     | 86, 87, 88       | 89                                | 1 - 100           | 10                 | no              | no                      | no                |
| 57     | 88               | <sup>103</sup> Rh                 | 0 - 10            | 1 to 5             | no              | no                      | no                |
| uniovi | 88               | <sup>87</sup> Sr                  | IDA               |                    | yes             | no                      | no                |

Table SI-16: Molybdenum.

| Lab    | Working Isotopes | Internal Standard                  | Calibration Range | Dilution Factor  | Quality Control | Interference Correction | Cell Gas       |
|--------|------------------|------------------------------------|-------------------|------------------|-----------------|-------------------------|----------------|
| 1      | 95               | Rh-Tb                              | 0 - 10            | 1/2              | yes             | no                      | no             |
| 2      |                  |                                    |                   |                  |                 |                         |                |
| 3      |                  |                                    |                   |                  |                 |                         |                |
| 4      | 95               | <sup>115</sup> In                  | 0 - 25            |                  | yes             | no                      | no             |
| 6      | 95               | no                                 | 0 - 25            | no               | yes             | no                      | no             |
| 7      |                  |                                    |                   |                  |                 |                         |                |
| 8      | 95               | Rh                                 | 1 - 10            | 1                | yes             | no                      | no             |
| 9      | 98               | no                                 |                   |                  |                 | no                      |                |
| 10     |                  |                                    |                   |                  |                 |                         |                |
| 11     | 95               | <sup>89</sup> Y                    | 1 - 50            |                  | yes             | no                      | no             |
| 13     | 95               | 72                                 |                   | 1                | yes             | no                      | no             |
| 14     |                  |                                    |                   |                  |                 |                         |                |
| 15     | 97               | <sup>89</sup> Y                    | 0.2 - 25          |                  | no              | no                      | H <sub>2</sub> |
| 16     | 95 (98)          | <sup>89</sup> Y                    | 0 - 10            |                  | yes             | no                      | no             |
| 17     | 95               | no                                 | 0 - 40            | 1                | no              | no                      | no             |
| 18     | 95               | Y                                  | 0.3 - 20          |                  | yes             | no                      | no             |
| 19     | 98               | In                                 | 0 - 100           |                  | no              | no                      | no             |
| 21     |                  |                                    |                   |                  |                 |                         |                |
| 22     | 95, 98           | Rh                                 |                   |                  | yes             | no                      | no             |
| 23     | 98               | <sup>89</sup> Y                    | 0 - 1             |                  | no              | no                      | He             |
| 24     | 98               | <sup>115</sup> In                  |                   |                  |                 |                         |                |
| 25     | 95               | <sup>115</sup> In                  | 0.5 - 50          | 1                |                 | no                      | no             |
| 27     | 98               |                                    | 0.2 - 10          | no               | yes             | no                      | no             |
| 28     | 98               | In                                 | 0.1 - 5           | no               | no              | no                      | no             |
| 30     | 98               | Rh                                 | 1 - 25            | without dilution | yes             | yes                     |                |
| 32     | 98               | <sup>115</sup> In                  | 0 - 25            | 1.075            | yes             | no                      | no             |
| 33     |                  |                                    |                   |                  |                 |                         |                |
| 34     | 95               | <sup>89</sup> Y- <sup>115</sup> In | 0.1 - 5           | 10               | yes             | no                      | no             |
| 35     |                  |                                    |                   |                  |                 |                         |                |
| 37     | 95               | <sup>89</sup> Y                    | 0.25 - 25         |                  | yes             | yes                     | low res        |
| 38     | 98               | In                                 | 0.1 - 10          |                  | yes             | no                      | no             |
| 39     | 95               | Sc, In, Bi                         | 2 - 1200          | 1.25, 1.67, 2.51 | yes             | no                      | no             |
| 40     |                  |                                    |                   |                  |                 |                         |                |
| 41     | 95               | Rh                                 |                   | 50%              | no              | no                      | no             |
| 42     |                  |                                    |                   |                  |                 |                         |                |
| 44     | 95, 97, 98       | Rh                                 | 0 - 5             | 3.3              |                 | no                      | no             |
| 45     |                  |                                    |                   |                  |                 |                         |                |
| 48     | 98               | Sc                                 | 0 - 22            | ~1               | yes             | no                      | no             |
| 49     | 95               | Y                                  | 10 - 100          |                  | yes             | yes                     | no             |
| 50     | 95, 97, 98       | Rh                                 | 0.5 - 50          | without dilution | yes             | yes                     | no             |
| 51     |                  |                                    |                   |                  |                 |                         |                |
| 52     | 95, 97           | Ga                                 | 1 - 100           |                  | yes             | no                      | no             |
| 54     | 98               | Sc, Rb, Pd, Pt, Y                  | 1 - 50            |                  | yes             | yes                     | no             |
| 55     | 95               | Sc, In, Tb, Bi                     | 0.5 - 250         | 1                | yes             | yes                     | no             |
| 56     | 95, 96, 98       | 103                                | 1 - 5             | 1.01             | no              | no                      | no             |
| 57     | 95               | <sup>71</sup> Ga                   | 0 - 0.5           | 1 to 5           | no              | no                      | no             |
| uniovi | 97               | <sup>95</sup> Mo                   | IDA               |                  | yes             | no                      | no             |

Table SI-17: Uranium.

| Lab    | Working Isotopes | Internal Standard | Calibration Range | Dilution Factor    | Quality Control | Interference Correction | Cell Gas       |
|--------|------------------|-------------------|-------------------|--------------------|-----------------|-------------------------|----------------|
| 1      | 238              | Tb                | 0 - 10            | 1/2                | yes             | no                      | no             |
| 2      |                  |                   |                   |                    |                 |                         |                |
| 3      |                  |                   |                   |                    |                 |                         |                |
| 4      |                  |                   |                   |                    |                 |                         |                |
| 6      |                  |                   |                   |                    |                 |                         |                |
| 7      | 238              | <sup>205</sup> Tl | 0 - 150           |                    | no              | no                      | no             |
| 8      | 238              | <sup>185</sup> Re | 1 - 25            | 1                  | yes             | no                      | no             |
| 9      | 238              | no                |                   |                    |                 | no                      |                |
| 10     |                  |                   |                   |                    |                 |                         |                |
| 11     |                  |                   |                   |                    |                 |                         |                |
| 13     | 238              | 209               |                   | 1                  | yes             | no                      | no             |
| 14     | 238              | Bi                | 0 - 20            | 1                  | yes             | no                      | no             |
| 15     |                  |                   |                   |                    |                 |                         |                |
| 16     | 238              | <sup>159</sup> Tb | 0 - 10            |                    | yes             | no                      | no             |
| 17     | 238              | no                | 0 - 40            | 1                  | no              | no                      | no             |
| 18     | 238              | Bi                | 0.3 - 20          |                    | yes             | no                      | no             |
| 19     | 238              | In                | 0 - 100           |                    | no              | no                      | no             |
| 21     | 238              |                   | 1 - 100           |                    | no              |                         |                |
| 22     | 238              | Tl                |                   |                    | yes             | no                      | no             |
| 23     |                  |                   |                   |                    |                 |                         |                |
| 24     |                  |                   |                   |                    |                 |                         |                |
| 25     | 238              | <sup>185</sup> Re | 0.5 - 50          | 1                  |                 | no                      | no             |
| 27     | 238              |                   | 1 - 10            | no                 | yes             | no                      | no             |
| 28     | 238              | In                | 0.1 - 5           | no                 | no              | no                      | no             |
| 30     | 238              | Rh                | 1 - 25            | without dilution   | yes             | no                      |                |
| 32     | 238              | Bi                | 0 - 25            | 1.075              | yes             | no                      | no             |
| 33     |                  |                   |                   |                    |                 |                         |                |
| 34     | 238              | <sup>209</sup> Bi | 0.1 - 5           | 10                 | yes             | no                      | no             |
| 35     | 238              | Rh                | 0.5 - 20          | 8/25, 12/25, 20/25 | yes             |                         | no             |
| 37     | 238              | <sup>205</sup> Tl | 0.25 - 25         |                    | yes             | no                      | low res        |
| 38     | 238              | In                | 0.1 - 5           |                    | yes             | no                      | no             |
| 39     | 235, 238         | Sc, In, Bi        | 2 - 1200          | 1.25, 1.67, 2.51   | yes             | no                      | no             |
| 40     | 238              | Rh                | 0.5 - 10          | 2                  | no              |                         | no             |
| 41     | 238              | Tl                | 0.5 - 5           | 50%                | yes             | no                      | no             |
| 42     |                  |                   |                   |                    |                 |                         |                |
| 44     | 238              | Bi                | 0 - 5             | 3.3                | yes             | no                      | H <sub>2</sub> |
| 45     |                  |                   |                   |                    |                 |                         |                |
| 48     | 238              | Bi                | 0 - 24            | ~1                 | yes             | no                      | no             |
| 49     | 238              | Bi                | 10 - 100          |                    | yes             |                         | no             |
| 50     | 238              | Re                | 0.5 - 50          | without dilution   | yes             | no                      | no             |
| 51     | 238              |                   | 1 - 20            |                    | no              | no                      | no             |
| 52     | 235, 238         | In                | 1 - 100           |                    | yes             | no                      | no             |
| 54     |                  |                   |                   |                    |                 |                         |                |
| 55     | 238              | Sc, In, Tb, Bi    | 0.5 - 250         | 1                  | yes             | no                      | no             |
| 56     | 235, 238         | 103               | 1 - 5             | 1.01               | no              | no                      | no             |
| 57     | 238              | <sup>203</sup> Tl | 0 - 0.5           | 1 to 5             | no              | no                      | no             |
| uniovi | 238              | <sup>232</sup> Th | 0 - 10            |                    | yes             | no                      | no             |

Table SI-18: Zinc.

| Lab    | Working Isotopes | Internal Standard                 | Calibration Range | Dilution Factor    | Quality Control | Interference Correction | Cell Gas        |
|--------|------------------|-----------------------------------|-------------------|--------------------|-----------------|-------------------------|-----------------|
| 1      | 66               | Rh-Tb                             | 0 - 50            | 1/2                | yes             | no                      | no              |
| 2      |                  |                                   |                   |                    |                 |                         |                 |
| 3      | 66               | <sup>71</sup> Ga                  | 0 - 50            |                    | yes             | no                      | no              |
| 4      | 66               | <sup>115</sup> In                 | 0 - 25            |                    | yes             | no                      | no              |
| 6      | 66               | no                                | 0 - 25            | no                 | yes             | no                      | no              |
| 7      | 66               | <sup>103</sup> Rh                 | 0 - 150           |                    | no              | no                      | no              |
| 8      | 66               | Rh                                | 1 - 25            |                    | yes             | no                      | no              |
| 9      | 66               | no                                |                   |                    |                 | no                      |                 |
| 10     | 66               | <sup>71</sup> Ga                  | 0 - 50            | 1                  | yes             | no                      | no              |
| 11     | 66               | <sup>72</sup> Ge                  | 1 - 50            |                    | yes             | no                      | no              |
| 13     | 66               | 72                                |                   | 1                  | yes             | no                      | no              |
| 14     | 66               | Ga                                | 0 - 50            |                    | yes             | no                      | no              |
| 15     | 64               | <sup>89</sup> Y                   | 0.2 - 25          |                    | no              | no                      | H <sub>2</sub>  |
| 16     | 66 (64)          | <sup>72</sup> Ge                  | 0 - 100           |                    | yes             | no                      | no              |
| 17     | 66               | Y                                 | 0 - 40            | 1                  | no              | no                      | no              |
| 18     | 66               | Y                                 | 0.3 - 100         |                    | yes             | no                      | no              |
| 19     | 66               | In                                | 0 - 250           |                    | no              | no                      | no              |
| 21     | 66, 68           | no                                | 1 - 100           |                    | no              |                         |                 |
| 22     | 66, 68           | Rh                                |                   |                    | yes             | no                      | no              |
| 23     | 66               | <sup>89</sup> Y                   | 0 - 8             |                    | no              |                         | He              |
| 24     | 66               | <sup>89</sup> Y                   |                   |                    |                 |                         |                 |
| 25     | 66               | <sup>45</sup> Sc                  | 0.5 - 100         | 1                  |                 | no                      | no              |
| 27     | 64               |                                   | 1 - 20            | no                 | yes             | no                      | no              |
| 28     | 66               | In                                | 0 - 25            | no                 | no              | no                      | CH <sub>4</sub> |
| 30     | 66               | Rh                                | 1 - 25            | without dilution   | yes             | no                      | no              |
| 32     | 66               | In                                | 0 - 100           | 1.075              | yes             | no                      | no              |
| 33     | 66               | Er                                |                   | 1                  | yes             | no                      | no              |
| 34     | 66               | <sup>45</sup> Sc- <sup>89</sup> Y | 0.1 - 5           | 10                 | yes             | no                      | no              |
| 35     | 64               | Rh                                | 0.5 - 20          | 8/25, 12/25, 20/25 | yes             | yes                     | no              |
| 37     | 66               | <sup>72</sup> Ge                  | 0.25 - 25         |                    | yes             | no                      | low res         |
| 38     | 66               | In                                | 5 - 50            |                    | yes             | no                      | no              |
| 39     | 67               | Sc, In, Bi                        | 2 - 1200          | 1.25, 1.67, 2.51   | yes             | no                      | no              |
| 40     | 67               | Rh                                | 1 - 10            | 2                  | yes             |                         | no              |
| 41     | 66               | Rh                                | 1 - 20            | 50%                | yes             | no                      | no              |
| 42     | 66               | <sup>103</sup> Rh                 | 1 - 200           | 1.04               | yes             | no                      | no              |
| 44     | 66, 67, 68       | Rh                                | 0 - 5             | 3.3                | yes             | no                      | H <sub>2</sub>  |
| 45     | 64               | Rh                                | 0.16 - 200        |                    | yes             | yes                     | no              |
| 48     | 66               | Sc                                | 0 - 23            | ~1                 | yes             | no                      | no              |
| 49     | 68               | Ge                                | 10 - 100          |                    | yes             |                         | no              |
| 50     | 66, 68           | Ge                                | 0.5 - 100         | without dilution   | yes             | no                      | no              |
| 51     | 66               |                                   | 1 - 40            |                    | no              | no                      | no              |
| 52     | 64, 66           | Ga                                | 1 - 100           |                    | yes             | no                      | no              |
| 54     | 66               | Sc, Rb, Pd, Pt, Y                 | 1 - 50            |                    | yes             | no                      |                 |
| 55     | 68               | Sc, In, Tb, Bi                    | 0.5 - 250         | 1                  | yes             | no                      | no              |
| 56     | 64, 66, 68       | 89                                | 1 - 25            | 1.01               | no              | no                      | no              |
| 57     | 66               | <sup>71</sup> Ga                  | 0 - 5             | 1 to 5             | no              | no                      | no              |
| uniovi | 66               | <sup>67</sup> Zn                  | IDA               |                    | yes             | no                      | H <sub>2</sub>  |

**Figure SI-1.** Signal intensity of  $^{56}\text{Fe}$ ,  $^{57}\text{Fe}$ ,  $^{75}\text{As}$  and  $^{80}\text{Se}$  as a function of the hydrogen flow rate in the octapole reaction cell. Signal intensity for the blank solution (1% (w/w)  $\text{HNO}_3$ ) (red line), signal intensity for a  $40\ \mu\text{g kg}^{-1}$  iron, arsenic and selenium standard (blue line); and, background equivalent concentration (BEC) expressed in  $\mu\text{g kg}^{-1}$  (green line).

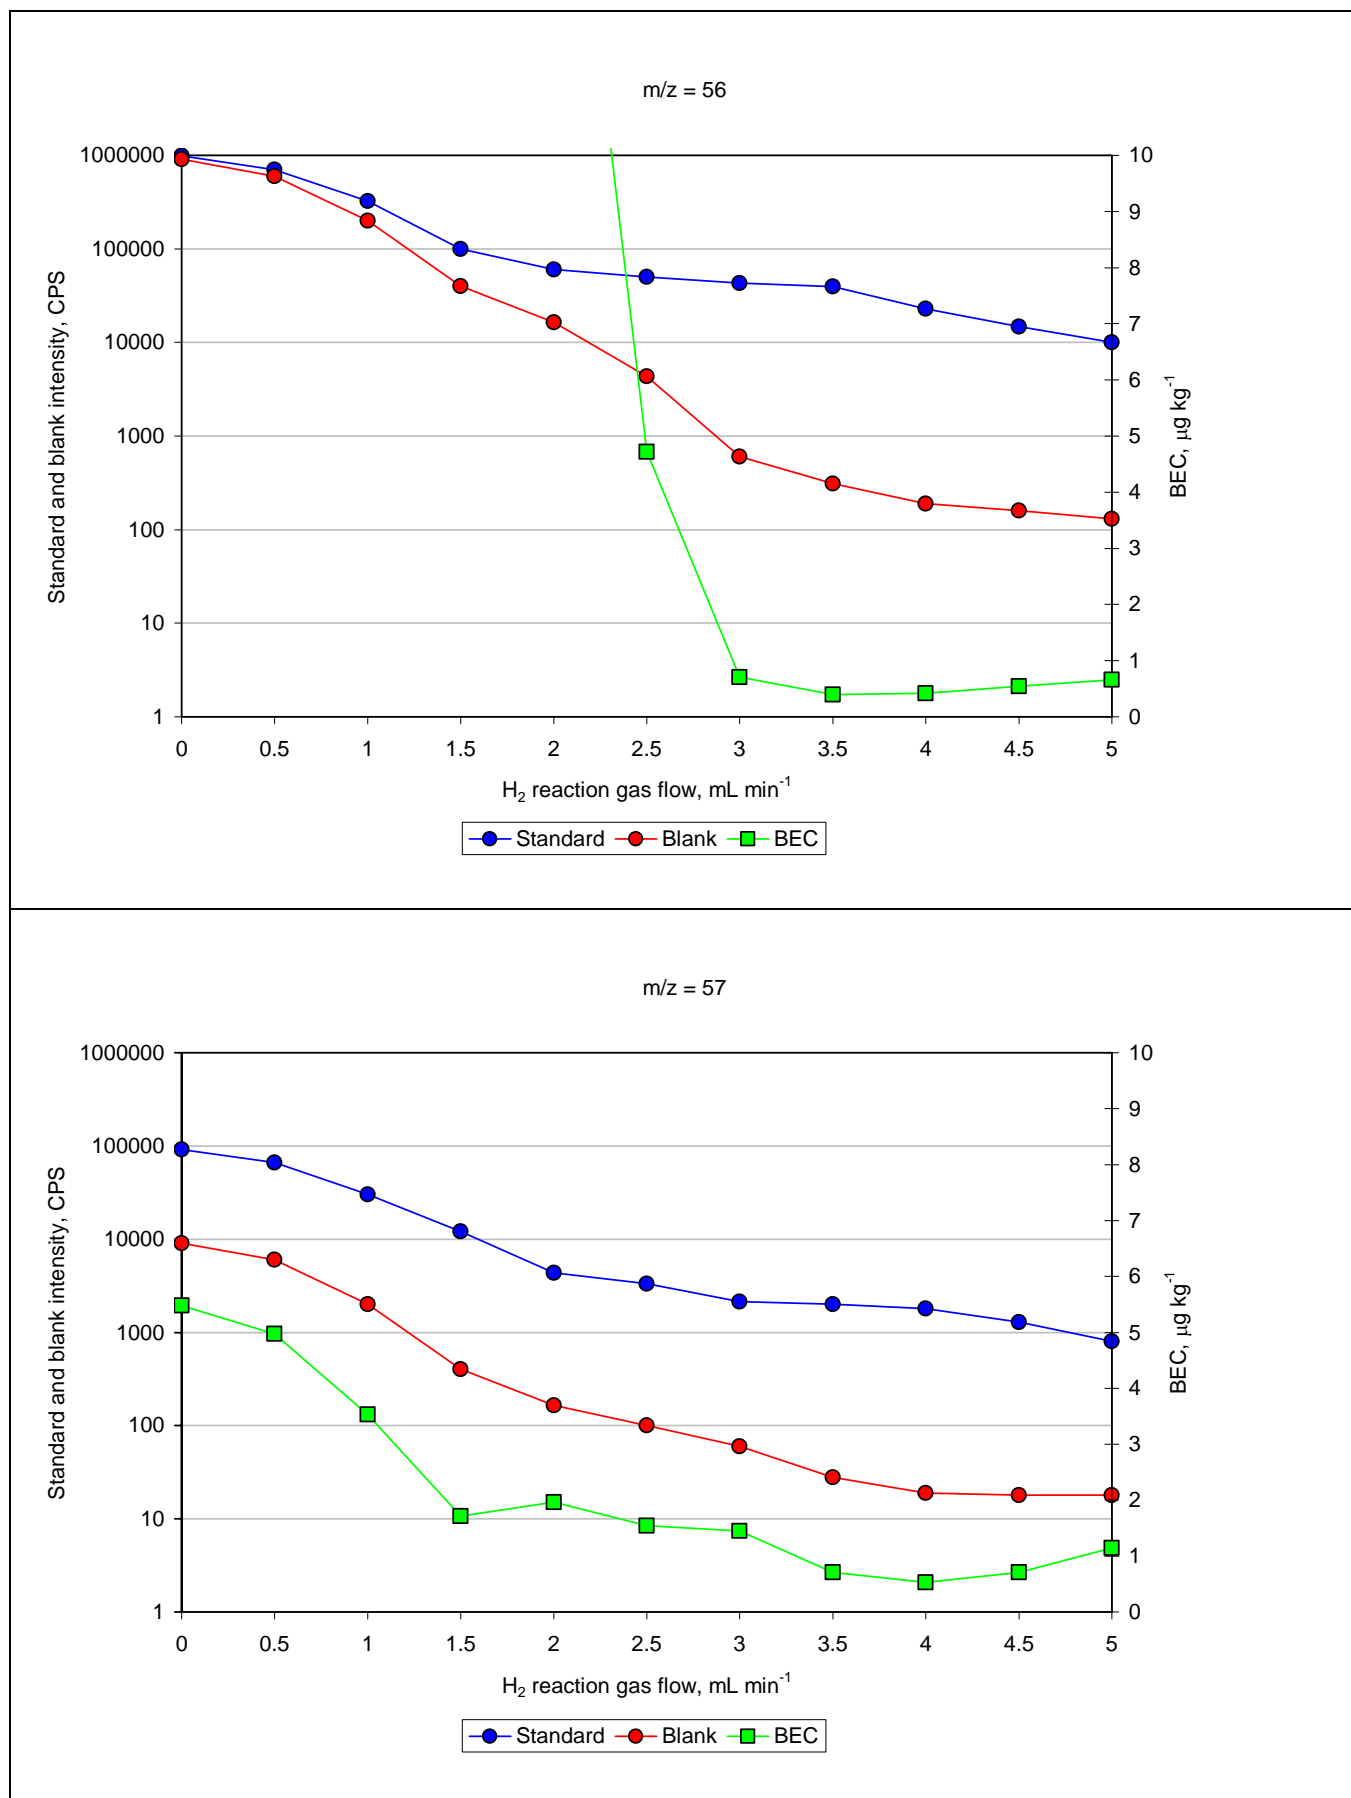

**Figure SI-1 (cont.).** Signal intensity of  $^{56}\text{Fe}$ ,  $^{57}\text{Fe}$ ,  $^{75}\text{As}$  and  $^{80}\text{Se}$  as a function of the hydrogen flow rate in the octapole reaction cell. Signal intensity for the blank solution (1% (w/w)  $\text{HNO}_3$ ) (red line), signal intensity for a  $40\ \mu\text{g}\ \text{kg}^{-1}$  iron, arsenic and selenium standard (blue line); and, background equivalent concentration (BEC) expressed in  $\mu\text{g}\ \text{kg}^{-1}$  (green line).

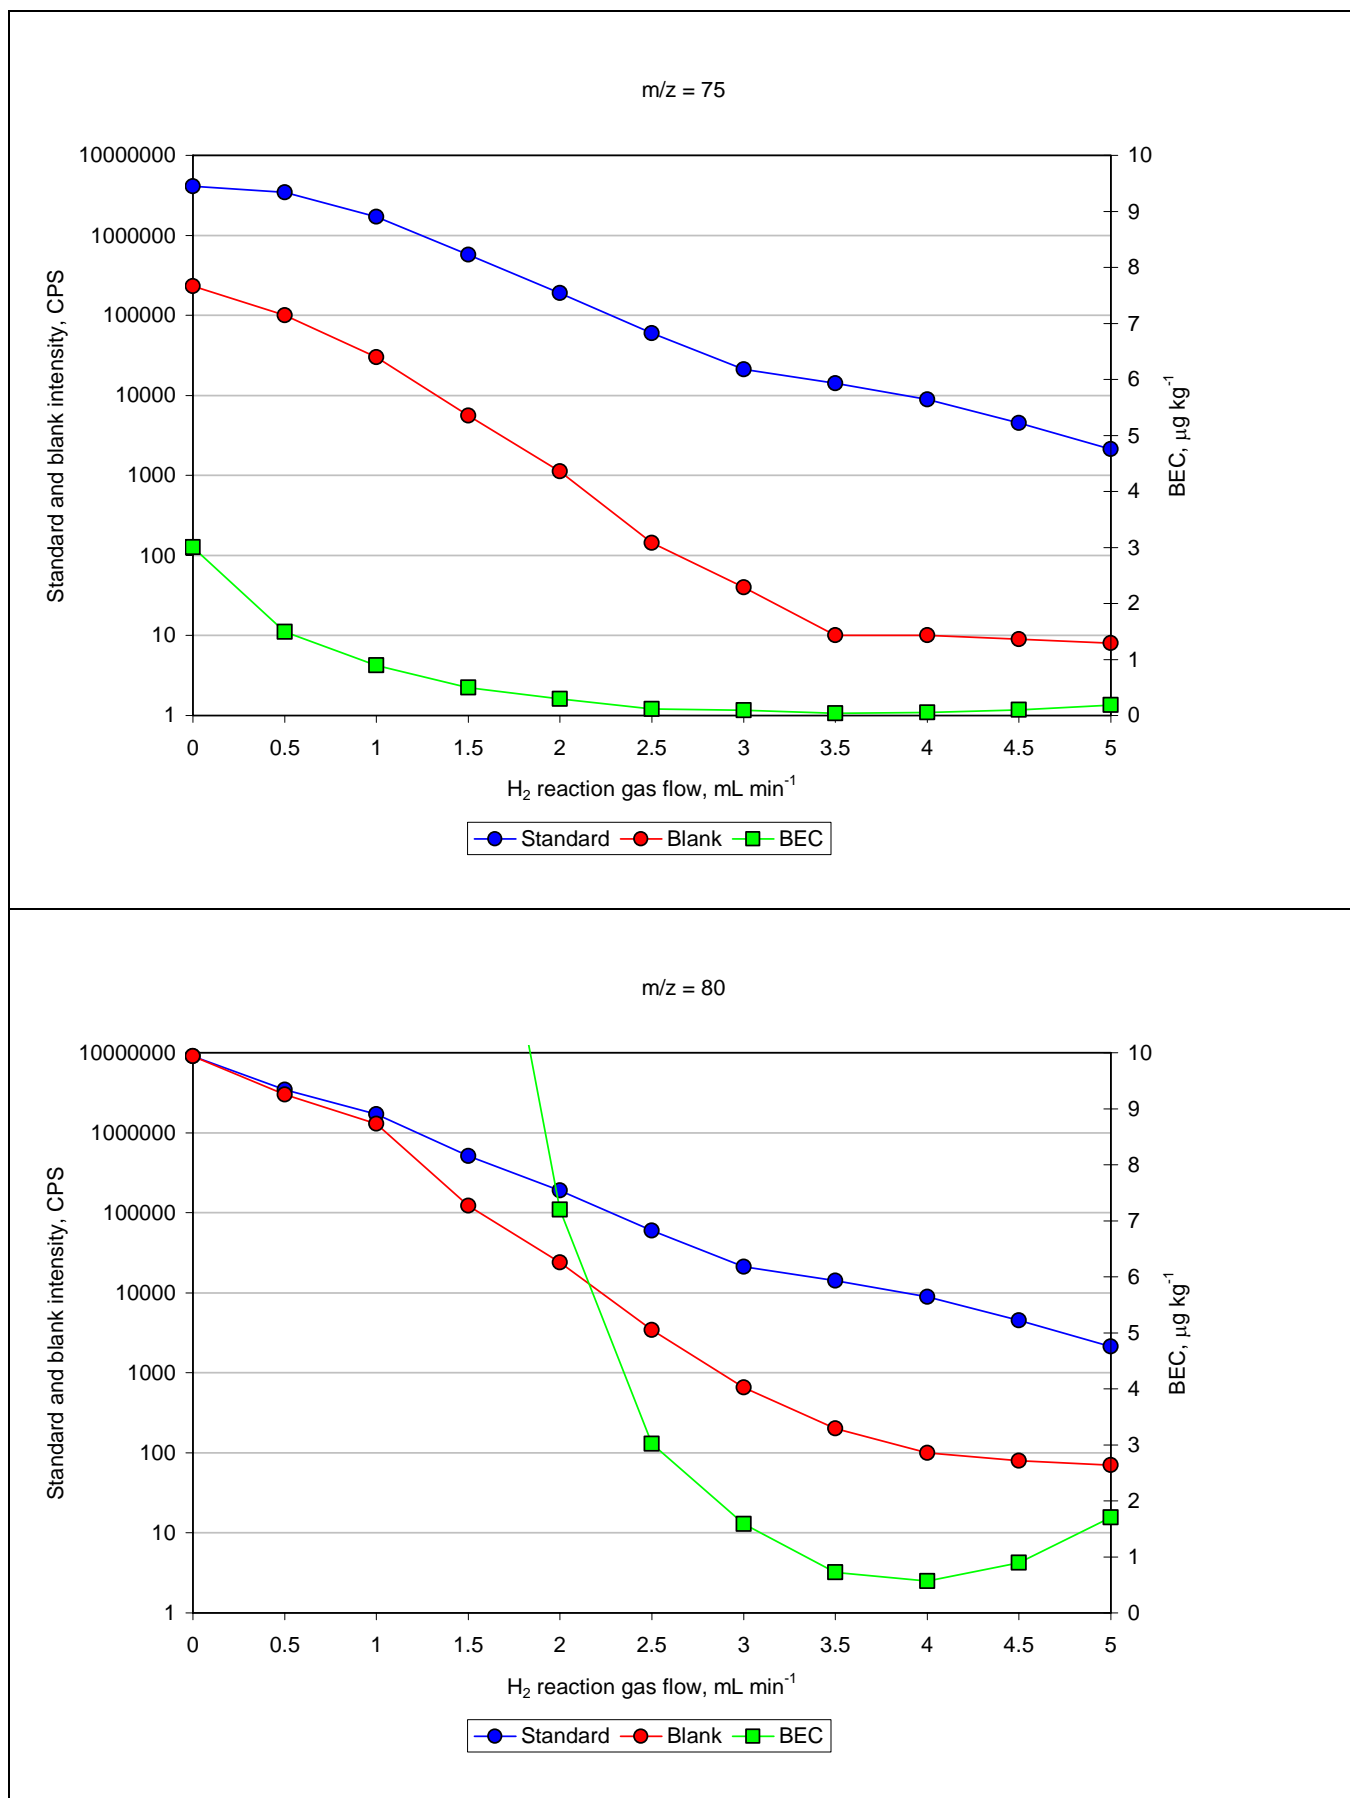

Supplement: b905037j.pdf [file b905037j.pdf]
